# Supplementary material for: How does digital inclusive finance improve the climate resilience of food production?
Source: Frontiers journal article supplement (doi:10.3389/fsufs.2025.1612111), 2025-08-04
Supplement: Table_1.xlsx [file Table_1.xlsx]

## Sheet: Sheet1
id	province	year	crfpp	df	irr	heat	prcp	first	fert	plastic	elec	diesel	area	pest	ftech	xjj	lnarea	lnpest	lnplastic	lnprcp	ddf	lnheat	yzx	pjl	aia	atech	ass
1	Beijing	2011	0.272415	79.41	0.700991	54.6791	720.6	44.9882	0.457369	43.848	1.50033	0.132188	209.4	12.8883	1355	0.419597	5.34425	2.55632	3.78073	6.58008	0.7941	4.00186	1	70.3	0.879218	0.3399	0.386593
1	Beijing	2012	1.07125	150.65	0.746466	53.2526	733.2	42.0232	0.483551	44.3903	1.67351	0.137955	193.9	13.7955	1876	0.45381	5.26734	2.62435	3.79302	6.59742	1.5065	3.97594	1	72.2	0.80908	0.3774	0.466456
1	Beijing	2013	1.12664	215.62	0.644865	63.2375	579.1	40.4026	0.52701	50.9545	2.00124	0.152577	158.9	16.0825	2150	0.467249	5.06827	2.77773	3.93093	6.36148	2.1562	4.1463	1	75.2	0.769137	0.631	0.8204
1	Beijing	2014	1.35889	235.36	0.735255	76.0752	461.5	36.9224	0.593575	55.5987	2.57828	0.173381	120.2	18.358	2309	0.513248	4.78916	2.91006	4.01816	6.13448	2.3536	4.33205	1	75.3	0.69658	0.7759	1.11387
1	Beijing	2015	1.95522	276.38	0.797897	60.3847	458.6	41.9509	0.606218	59.882	2.97467	0.161197	104.5	18.4226	3065	0.589338	4.64919	2.91358	4.09238	6.12818	2.7638	4.10099	1	76.5	0.78858	0.9858	1.25009
1	Beijing	2016	1.35572	286.37	0.882652	73.2224	669.1	42.951	0.66323	67.8137	3.76014	0.171821	87.3	20.6186	2919	0.654761	4.46935	3.02619	4.21676	6.50593	2.8637	4.29319	1	77.8	0.821662	1.0676	1.29932
1	Beijing	2017	1.31279	329.94	0.954854	66.0903	576.4	42.1088	0.707196	74.2151	5.08768	0.181969	66.8	22.3325	3189	0.661587	4.2017	3.10604	4.30697	6.3568	3.2994	4.19117	1	79	0.792947	1.0308	1.29996
1	Beijing	2018	1.65069	368.54	1.05665	90.3393	546.6	38.6663	0.702312	79.4152	6.27553	0.183044	55.6	25.0482	3838	0.675568	4.01818	3.2208	4.37469	6.30372	3.6854	4.50314	1	80.3	0.714648	1.1615	1.62527
1	Beijing	2019	1.79096	399	1.23365	68.9432	403.3	36.3259	0.696388	86.8962	7.64898	0.20316	46.5	25.9594	3647	0.770107	3.83945	3.25653	4.46471	5.99968	3.99	4.23266	1	81.5	0.681623	1.1474	1.68334
1	Beijing	2020	1.7635	417.88	1.11377	57.5319	528	40.8344	0.617108	77.0061	7.0611	0.173116	48.9	21.8839	4200	0.79169	3.88978	3.08575	4.34389	6.2691	4.1788	4.05178	1	82.7	0.784166	1.2532	1.59813
1	Beijing	2021	1.01232	437.58	0.928693	54.6791	686.5	45.631	0.534805	60.8998	5.67742	0.135823	60.9	19.8132	5084	0.887177	4.10923	2.98635	4.10923	6.53161	4.3758	4.00186	1	83.9	0.856319	1.8238	2.12981
1	Beijing	2022	1.40583	457.48	0.779555	71.796	585.4	48.3967	0.458971	48.6787	4.21419	0.11822	76.7	13.9082	2518	1	4.3399	2.63248	3.88524	6.3723	4.5748	4.27383	1	89.8	0.894505	1.8959	2.1195
2	Tianjin	2011	0.270308	60.58	0.763928	56.1055	485.8	49.7707	0.521154	26.8547	1.09615	0.339744	310.8	8.11966	495	0.201765	5.73915	2.09429	3.29044	6.1858	0.6058	4.02714	1	55.6	0.972685	0.0867	0.0891347
2	Tianjin	2012	0.471239	122.96	0.750679	44.6942	755.3	50.1435	0.510438	25.8894	1.07766	0.334029	322.9	7.93319	781	0.256258	5.77734	2.07106	3.25383	6.62711	1.2296	3.79997	1	58.5	0.965422	0.1079	0.111765
2	Tianjin	2013	0.524408	175.26	0.699846	66.0903	411.5	50.3047	0.514044	27.246	1.46188	0.323126	332.8	7.60296	1018	0.273332	5.80754	2.02854	3.30491	6.01981	1.7526	4.19117	1	61.3	0.957643	0.1676	0.175013
2	Tianjin	2014	0.425683	200.16	0.697208	68.9432	441.4	49.5527	0.485804	25.6242	2.27641	0.319415	345.8	7.51566	1193	0.333945	5.84586	2.01699	3.24354	6.08995	2.0016	4.23266	1	61.4	0.934863	0.1872	0.200243
2	Tianjin	2015	0.590854	237.53	0.712865	66.0903	574.2	48.2269	0.464392	22.4987	2.18422	0.33049	350	7.46269	1645	0.352058	5.85793	2.00992	3.11346	6.35298	2.3753	4.19117	1	63	0.906555	0.2691	0.296838
2	Tianjin	2016	1.01355	245.84	0.691115	68.9432	608.6	45.9817	0.490872	26.243	2.07776	0.335812	357.3	7.43746	2085	0.43728	5.87858	2.00653	3.2674	6.41116	2.4584	4.23266	1	64.6	0.879642	0.3401	0.386635
2	Tianjin	2017	1.07021	284.03	0.697625	80.3545	513	47.9415	0.409784	24.8155	0.917406	0.318544	351.4	5.46075	2208	0.477283	5.86193	1.69759	3.21147	6.24028	2.8403	4.38701	1	66	0.90278	0.3607	0.399544
2	Tianjin	2018	1.02285	316.88	0.709716	93.1922	626.5	50.5019	0.394829	21.127	0.859772	0.0512462	350.2	5.12462	2420	0.467091	5.8585	1.63406	3.05055	6.44015	3.1688	4.53475	1	67.4	0.9334	0.4737	0.5075
2	Tianjin	2019	1.43094	344.11	0.742925	68.9432	490	48.9707	0.395808	19.7319	0.956373	0.0511821	339.3	5.36193	2034	0.503362	5.82688	1.67932	2.98224	6.19441	3.4411	4.23266	1	68.7	0.918891	0.4505	0.490265
2	Tianjin	2020	1.58331	361.46	0.713601	61.8111	704.5	48.0144	0.364742	17.9413	0.978292	0.0477099	350.2	4.76384	1948	0.540754	5.8585	1.56105	2.88711	6.55749	3.6146	4.1239	1	69.9	0.922049	0.5491	0.595522
2	Tianjin	2021	1.80646	379.23	0.684439	53.2526	913.9	50.7383	0.358352	16.3364	1.41968	0.0457666	373.5	3.98627	1951	0.588619	5.92292	1.38286	2.79339	6.81772	3.7923	3.97594	1	71	0.952165	0.743	0.780327
2	Tianjin	2022	1.96689	397.91	0.662909	68.9432	618.2	53.0878	0.349493	15.7835	1.18377	0.042841	376.7	4.50958	1964	0.609431	5.93145	1.50621	2.75897	6.42681	3.9791	4.23328	1	84	0.98121	0.5595	0.570214
3	Hebei	2011	0.183524	32.42	0.555259	62.6431	513.1	54.3659	0.371884	14.1086	0.637382	0.318224	6286.1	9.46009	444	0.0524658	8.7461	2.24708	2.64679	6.24047	0.3242	4.13676	1	36.1	1.06249	0.0677	0.0637182
3	Hebei	2012	0.190136	89.32	0.550482	53.4904	630.8	55.1775	0.375014	14.455	0.676331	0.331253	6302.4	9.65633	626	0.0690984	8.74869	2.26761	2.67104	6.44699	0.8932	3.97968	1	41.5	1.06234	0.0872	0.0820828
3	Hebei	2013	0.255137	144.98	0.516757	59.0771	559.3	56.2977	0.378366	15.545	0.704487	0.336145	6315.9	9.90948	821	0.079538	8.75083	2.29349	2.74374	6.32669	1.4498	4.07923	1	46.5	1.07173	0.1317	0.122886
3	Hebei	2014	0.206532	160.76	0.520907	57.6507	393.3	53.8411	0.385179	15.8288	0.724576	0.33398	6332	9.90463	843	0.0939657	8.75337	2.293	2.76183	5.97457	1.6076	4.05526	1	49.1	1.01577	0.1358	0.133692
3	Hebei	2015	0.30877	199.53	0.525905	45.5262	506	53.2933	0.383865	15.7879	0.700039	0.335477	6392.5	9.53111	1341	0.109071	8.76288	2.25456	2.75924	6.22654	1.9953	3.81771	1	50.5	1.00179	0.1917	0.191357
3	Hebei	2016	0.333474	214.36	0.52644	59.5527	608.9	52.3215	0.391839	16.3489	0.709513	0.258282	6327.4	9.64866	1400	0.138184	8.75264	2.26682	2.79416	6.41165	2.1436	4.08766	1	53.3	1.00092	0.2361	0.235883
3	Hebei	2017	0.334304	258.17	0.533865	70.964	484.2	53.7948	0.384175	15.2835	0.733941	0.267968	6658.5	9.25838	1799	0.153894	8.80365	2.22553	2.72677	6.1825	2.5817	4.26268	1	57	1.013	0.2728	0.269298
3	Hebei	2018	0.329184	282.77	0.548037	84.5149	509.2	54.0715	0.38111	13.399	0.616267	0.26546	6538.7	7.50265	3036	0.157374	8.78549	2.01526	2.59518	6.23284	2.8277	4.43675	1	60.7	0.999374	0.3907	0.390945
3	Hebei	2019	0.416909	305.06	0.551129	66.2092	507.6	51.3879	0.365524	12.6909	0.616732	0.246044	6469.2	7.04563	2983	0.174082	8.77481	1.95241	2.54088	6.22969	3.0506	4.19268	1	64.4	0.964249	0.4003	0.415142
3	Hebei	2020	0.525331	322.7	0.552576	43.7432	546.7	50.6243	0.353191	12.8244	0.630207	0.173684	6388.8	6.71113	4751	0.187239	8.7623	1.90377	2.55135	6.3039	3.227	3.77735	1	68	0.972168	0.6357	0.653899
3	Hebei	2021	1.00542	340.99	0.552043	36.2545	790.3	51.9332	0.341933	12.6018	0.587969	0.166107	6428.6	6.50731	5828	0.204477	8.76851	1.87293	2.53384	6.67241	3.4099	3.59182	1	73.3	0.974588	0.8705	0.893198
3	Hebei	2022	1.0608	359.67	0.505657	66.8036	508.1	52.6345	0.33473	12.4476	0.580848	0.162189	6443.8	6.28543	2814	0.220764	8.77087	1.83824	2.52153	6.23068	3.5967	4.20176	1	80.6	0.972832	0.8186	0.841461
4	Shanxi	2011	0.0214262	33.41	0.357256	63.8081	484	61.1664	0.301706	10.9367	0.228051	0.0808448	3287.9	7.4788	310	0.0599104	8.098	2.01207	2.39212	6.18208	0.3341	4.15575	1	39.3	1.1954	0.0368	0.0307848
4	Shanxi	2012	0.0217238	92.98	0.356866	61.6685	494.2	61.1661	0.310601	12.0438	0.249337	0.0808802	3291.5	7.82542	589	0.071471	8.0991	2.05738	2.48855	6.20294	0.9298	4.12228	1	44.2	1.17764	0.0404	0.0343059
4	Shanxi	2013	0.0272706	144.22	0.376999	79.0707	504.4	61.1551	0.319956	12.2671	0.263801	0.0814298	3274.3	8.06366	646	0.0801898	8.09386	2.08737	2.50692	6.22337	1.4422	4.37071	1	48.6	1.1642	0.0626	0.0537709
4	Shanxi	2014	0.0264512	167.66	0.384266	52.8247	542.9	60.5692	0.316144	12.7876	0.256595	0.0808796	3286.4	8.19369	847	0.0889489	8.09755	2.10336	2.54847	6.29692	1.6766	3.96651	1	50.6	1.1427	0.0697	0.0609958
4	Shanxi	2015	0.149925	206.3	0.404213	58.8157	439.9	59.4311	0.314648	12.7037	0.257	0.0790933	3287.2	8.22783	848	0.103511	8.09779	2.10752	2.5419	6.08655	2.063	4.07414	1	54.2	1.11717	0.0763	0.0682976
4	Shanxi	2016	0.152249	224.81	0.414109	69.9417	615.4	57.6554	0.325964	13.6216	0.27153	0.0813031	3241.4	8.52012	912	0.115892	8.08376	2.14243	2.61165	6.42227	2.2481	4.24707	1	55.5	1.10296	0.0853	0.0773373
4	Shanxi	2017	0.176609	259.95	0.422407	82.3514	579.5	60.7508	0.313059	13.9752	0.277449	0.0796623	3180.9	8.05009	1233	0.113429	8.06492	2.08568	2.63728	6.36217	2.5995	4.41158	1	57.3	1.14399	0.0943	0.0824307
4	Shanxi	2018	0.169719	283.65	0.427176	89.9114	522.9	61.2711	0.308309	13.8016	0.285272	0.0776328	3137.1	7.45387	1773	0.141566	8.05105	2.00873	2.62478	6.25939	2.8365	4.4987	1	57.9	1.13244	0.1281	0.113119
4	Shanxi	2019	0.24747	308.73	0.431089	80.0692	458.1	57.5922	0.307598	13.7768	0.297639	0.0749064	3126.2	7.17853	1588	0.147215	8.04757	1.97109	2.62299	6.12709	3.0873	4.38328	1	60.7	1.08067	0.1318	0.121962
4	Shanxi	2020	0.291397	325.73	0.428456	54.1085	561.3	55.58	0.30329	13.7207	0.308429	0.0734152	3130	7.02132	2024	0.161364	8.04879	1.94895	2.61891	6.33026	3.2573	3.99083	1	62.3	1.06733	0.2185	0.204716
4	Shanxi	2021	1.03964	342.91	0.42291	69.5137	733	57.3162	0.294426	13.3473	0.435981	0.0719064	3138.1	6.57581	2229	0.169795	8.05137	1.8834	2.59131	6.59715	3.4291	4.24133	1	63.9	1.07561	0.3185	0.296112
4	Shanxi	2022	1.07506	360.25	0.415882	82.6367	592.5	58.2565	0.286577	13.5674	0.432495	0.0697752	3150.3	6.36837	1832	0.182727	8.05525	1.85134	2.60767	6.38435	3.6025	4.41445	1	79.6	1.07674	0.2708	0.2515
5	Inner Mongolia	2011	0.125585	28.89	0.407505	69.7403	255	49.0151	0.248864	8.53173	0.0735594	0.0850926	5561.5	3.4459	254	0.0595818	8.62362	1.23718	2.14379	5.54126	0.2889	4.2442	1	34.6	0.957918	0.0134	0.0139887
5	Inner Mongolia	2012	0.262375	91.68	0.407418	57.4061	421	49.0879	0.264244	9.67766	0.0770897	0.0908583	5589.4	4.17948	283	0.0762976	8.62863	1.43019	2.26982	6.04263	0.9168	4.05004	1	38.9	0.945097	0.0142	0.0150249
5	Inner Mongolia	2013	0.323563	146.59	0.378083	65.3771	359	50.6488	0.280702	11.2078	0.0825937	0.0926337	5617.3	4.34047	390	0.0861622	8.63361	1.46798	2.41661	5.88332	1.4659	4.18052	1	43.9	0.964193	0.0228	0.0236467
5	Inner Mongolia	2014	0.274035	172.56	0.3728	53.2526	335	52.3208	0.302705	12.1546	0.0858075	0.101142	5651	4.20065	455	0.106591	8.63959	1.43524	2.49771	5.81413	1.7256	3.97594	1	45.7	0.987086	0.0291	0.0294807
5	Inner Mongolia	2015	0.34844	214.55	0.366455	54.9728	325.5	53.3952	0.303056	12.5558	0.0954822	0.106238	5726.7	4.36052	571	0.110137	8.65289	1.47259	2.53018	5.78536	2.1455	4.00733	1	50.3	1.00371	0.0426	0.0424427
5	Inner Mongolia	2016	0.348443	229.93	0.34961	62.0209	283	52.7032	0.261957	10.6765	0.0793663	0.09043	5784.8	3.60604	569	0.120758	8.66299	1.28261	2.36804	5.64545	2.2993	4.12713	1	52.2	1.00822	0.0482	0.0478068
5	Inner Mongolia	2017	0.362525	258.5	0.352202	77.2079	208.2	50.9938	0.260744	10.462	0.0875286	0.081649	6780.9	3.94932	715	0.125617	8.82187	1.37355	2.34775	5.3385	2.585	4.3464	1	55.2	0.960257	0.0562	0.058526
5	Inner Mongolia	2018	0.354703	271.57	0.36225	75.6138	328.2	50.6646	0.252343	10.6492	0.0969051	0.0897542	6789.9	3.35445	1054	0.129361	8.82319	1.21029	2.36548	5.79362	2.7157	4.32546	1	58.3	0.936406	0.1013	0.10818
5	Inner Mongolia	2019	0.403874	293.89	0.360066	56.483	279.5	50.572	0.245853	10.6015	0.1026	0.0871131	6827.5	3.07259	998	0.138335	8.82871	1.12252	2.36099	5.633	2.9389	4.03424	1	61.5	0.948939	0.1055	0.111177
5	Inner Mongolia	2020	0.494428	309.39	0.360147	57.6577	311.2	48.9295	0.233811	10.7283	0.104933	0.0879227	6833.2	2.63723	1497	0.148029	8.82955	0.96973	2.37288	5.74044	3.0939	4.05526	1	64.7	0.939622	0.1622	0.172623
5	Inner Mongolia	2021	1.06351	325.38	0.365892	55.1405	343.7	49.2658	0.276669	11.4671	0.137008	0.0922992	6884.3	3.05285	2158	0.163035	8.837	1.11608	2.43948	5.83977	3.2538	4.00915	1	67.9	0.924532	0.2284	0.247044
5	Inner Mongolia	2022	1.11606	342.28	0.500451	68.4398	314.5	51.1606	0.259865	13.1418	0.118048	0.0827362	6951.8	2.85691	2153	0.175643	8.84676	1.04974	2.5758	5.75098	3.4228	4.22595	1	80.5	0.945589	0.2343	0.247782
6	Liaoning	2011	0.046525	43.29	0.39734	52.7772	597	36.1468	0.348892	34.5775	0.883638	0.169815	3169.8	13.6527	788	0.11379	8.06142	2.61394	3.5432	6.39192	0.4329	3.96651	2	47.8	0.70643	0.1161	0.164348
6	Liaoning	2012	0.111052	103.53	0.414797	46.596	924.2	38.0894	0.348881	34.4497	0.886904	0.17076	3217.3	14.036	944	0.140247	8.0763	2.64163	3.5395	6.82893	1.0353	3.8416	2	50.2	0.733341	0.1124	0.153271
6	Liaoning	2013	0.144737	160.07	0.338878	62.1281	751.1	38.6706	0.360578	34.7054	0.937987	0.174634	3226.4	14.2558	1202	0.155348	8.07912	2.65717	3.5469	6.62154	1.6007	4.12875	2	55.9	0.736166	0.1471	0.199819
6	Liaoning	2014	0.340328	187.61	0.349299	58.3244	453.6	38.7364	0.363944	35.1113	1.04001	0.17891	3235.1	14.4809	1353	0.171421	8.08182	2.67283	3.55852	6.11722	1.8761	4.0656	2	58.8	0.730802	0.138	0.188834
6	Liaoning	2015	0.488694	226.4	0.350668	59.1168	498.4	44.276	0.360411	33.6364	1.08477	0.171805	3297.4	14.1946	1439	0.17396	8.10089	2.65286	3.51561	6.2114	2.264	4.07923	2	62.2	0.832288	0.179	0.21507
6	Liaoning	2016	0.550242	231.41	0.370749	61.4942	755.4	42.2381	0.348976	32.3552	1.15445	0.166639	3231.4	13.2699	1367	0.160538	8.08067	2.58549	3.47677	6.62725	2.3141	4.11904	2	62.6	0.808025	0.1985	0.245661
6	Liaoning	2017	0.576895	267.18	0.386008	77.8186	543.6	42.0727	0.348657	29.9095	1.26551	0.166095	3467.5	13.7814	1437	0.166832	8.15119	2.62332	3.39818	6.29821	2.6718	4.35414	2	64.2	0.792266	0.2151	0.2715
6	Liaoning	2018	0.611773	290.95	0.384903	67.9922	586.1	43.0684	0.344703	28.0421	0.727865	0.148321	3484	13.0969	1934	0.18171	8.15594	2.57238	3.33371	6.37349	2.9095	4.21951	2	65.8	0.796011	0.2813	0.353387
6	Liaoning	2019	0.842663	311.01	0.386327	60.2262	687.2	43.7708	0.331768	26.9154	0.419649	0.142041	3488.7	12.1173	1881	0.195501	8.15728	2.49464	3.2927	6.53263	3.1101	4.09767	2	67.3	0.821321	0.307	0.373788
6	Liaoning	2020	0.932924	326.29	0.380742	70.845	748	44.8836	0.320841	26.6759	0.430431	0.138066	3527.2	10.4301	2378	0.209808	8.16826	2.34469	3.28376	6.6174	3.2629	4.25986	2	68.7	0.861926	0.4122	0.478231
6	Liaoning	2021	0.900013	342.2	0.377117	48.9734	933	45.1027	0.311927	26.4233	0.387905	0.1356	3543.6	10.0224	3609	0.220728	8.1729	2.30482	3.27425	6.8384	3.422	3.89182	2	70.1	0.846406	0.585	0.691158
6	Liaoning	2022	1.07756	358.26	0.396727	54.996	914.6	43.5965	0.301602	26.1157	0.300446	0.134738	3561.5	9.70672	2771	0.235329	8.17794	2.27282	3.26254	6.81849	3.5826	4.00726	2	83.1	0.805784	0.5502	0.682813
7	Jilin	2011	0.419971	24.51	0.34122	62.6036	497.4	44.8519	0.373782	10.9279	0.0814009	0.12236	4545.1	8.73178	304	0.0681104	8.42181	2.16697	2.39132	6.20939	0.2451	4.13676	2	35.2	0.876555	0.03	0.0342249
7	Jilin	2012	0.431727	87.23	0.34092	50.3998	739.4	46.6254	0.388948	10.6677	0.0867717	0.12568	4610.3	9.63293	389	0.0898009	8.43605	2.26519	2.36722	6.60584	0.8723	3.91999	2	38.6	0.897688	0.0293	0.0326394
7	Jilin	2013	0.579543	138.36	0.268089	63.7129	763.3	47.243	0.400491	10.8043	0.0890987	0.126914	4789.9	10.5115	497	0.0977623	8.47427	2.35247	2.37995	6.63765	1.3836	4.15418	2	42.3	0.899358	0.0404	0.044921
7	Jilin	2014	0.577102	165.62	0.27645	55.947	521.6	48.5895	0.403647	10.3036	0.0868164	0.116289	5000.7	10.5961	408	0.116444	8.51733	2.36048	2.3325	6.2569	1.6562	4.02356	2	45.2	0.916692	0.0409	0.044617
7	Jilin	2015	1.00194	208.2	0.298582	67.9922	593.6	48.6138	0.407177	10.4178	0.0873378	0.117448	5078	10.97	520	0.125235	8.53267	2.39517	2.34352	6.38621	2.082	4.21951	2	47.7	0.913828	0.0604	0.0660956
7	Jilin	2016	1.03573	217.07	0.302176	57.5319	775.1	43.7744	0.385292	9.82402	0.0843284	0.110503	5021.7	9.64837	691	0.146202	8.52152	2.26679	2.28483	6.65299	2.1707	4.05178	2	50.9	0.837414	0.0663	0.0791723
7	Jilin	2017	1.07707	254.76	0.31104	71.1621	583	43.3965	0.37958	9.98193	0.0870165	0.111071	5544	9.25044	796	0.150037	8.62047	2.22467	2.30078	6.36819	2.5476	4.26549	2	54.6	0.817195	0.0747	0.0914103
7	Jilin	2018	1.08534	276.08	0.311311	63.2375	687	45.4581	0.375438	9.24468	0.0902005	0.110674	5599.7	8.38692	1030	0.153914	8.63047	2.12667	2.22405	6.53233	2.7608	4.1463	2	58.4	0.840178	0.1019	0.121284
7	Jilin	2019	1.09205	292.77	0.31216	58.4829	695.8	41.5158	0.371189	8.68549	0.0897157	0.107404	5644.9	7.96129	1006	0.17001	8.63851	2.07459	2.16165	6.54506	2.9277	4.06903	2	62.3	0.779008	0.1076	0.138124
7	Jilin	2020	1.069	308.26	0.309778	73.2224	766.4	41.3925	0.366266	8.35051	0.0919525	0.106974	5681.8	7.62965	1380	0.179072	8.64502	2.03204	2.12232	6.6417	3.0826	4.29319	2	66.4	0.794883	0.1466	0.18443
7	Jilin	2021	1.10507	324.13	0.307963	56.4224	681.9	43.8348	0.360427	7.70167	0.116872	0.104734	5721.3	7.29566	1878	0.190179	8.65195	1.98728	2.04144	6.52488	3.2413	4.03247	2	73	0.822612	0.1965	0.238873
7	Jilin	2022	1.34464	340.01	0.306196	53.5696	818.9	47.0089	0.357671	7.3879	0.0944366	0.0990942	5785.1	7.06668	1757	0.199408	8.66304	1.95539	1.99984	6.70796	3.4001	3.98098	2	78.6	0.868855	0.2168	0.249524
8	Heilongjiang	2011	1.07877	33.58	0.315111	64.6639	444.5	57.3135	0.186895	6.18421	0.0476483	0.109303	11502.9	6.38146	654	0.0590074	9.35035	1.8534	1.822	6.09695	0.3358	4.16976	2	31.5	1.1201	0.0616	0.0549952
8	Heilongjiang	2012	1.07152	87.91	0.342899	57.8885	553	60.9017	0.196355	6.91264	0.0525701	0.113753	11519.5	6.57841	1050	0.0792855	9.3518	1.88379	1.93335	6.31536	0.8791	4.05872	2	34.7	1.17255	0.0672	0.0573109
8	Heilongjiang	2013	0.544178	141.4	0.375888	63.0236	581.2	64.7944	0.200774	6.99774	0.0548735	0.114992	11564.4	6.88479	1304	0.103557	9.35569	1.92931	1.94559	6.3651	1.414	4.14314	2	39.5	1.23348	0.0989	0.0801796
8	Heilongjiang	2014	1.15966	167.8	0.365934	54.6791	623.6	65.6332	0.206063	6.90534	0.0568956	0.118601	11696.4	7.14876	1370	0.107248	9.36704	1.96694	1.9323	6.43551	1.678	4.00186	2	41.7	1.23824	0.0913	0.0737338
8	Heilongjiang	2015	0.328419	209.93	0.373406	60.5987	648.6	62.7613	0.20767	6.75915	0.0590369	0.117944	11765.2	6.74313	1814	0.118357	9.3729	1.90852	1.9109	6.47482	2.0993	4.10429	2	44.5	1.17977	0.1178	0.0998502
8	Heilongjiang	2016	0.256446	221.89	0.400064	50.7564	564.2	61.3067	0.170437	5.56829	0.0522405	0.0981152	11804.7	5.56324	2110	0.132714	9.37625	1.71618	1.71709	6.33541	2.2189	3.9279	2	48.1	1.17281	0.1287	0.109736
8	Heilongjiang	2017	0.0216324	256.78	0.408392	66.7322	526.6	62.1351	0.170102	5.40169	0.0540169	0.0994068	14154.3	5.63396	2283	0.142066	9.55777	1.72881	1.68671	6.26644	2.5678	4.20021	2	52	1.17006	0.1287	0.109994
8	Heilongjiang	2018	0.0344493	274.73	0.417054	48.7594	633.3	64.6302	0.167406	5.277	0.056429	0.100455	14214.5	5.0568	2471	0.141655	9.56202	1.62074	1.66336	6.45094	2.7473	3.88773	2	56.3	1.19452	0.1322	0.110672
8	Heilongjiang	2019	0.058361	292.87	0.41825	45.6927	728.3	63.6509	0.151163	4.86327	0.057982	0.0930258	14338.1	4.35339	2471	0.158718	9.57068	1.47096	1.58171	6.59071	2.9287	3.8221	2	60.9	1.19435	0.118	0.0987983
8	Heilongjiang	2020	0.0862877	306.08	0.413921	45.4074	723.1	62.8158	0.150381	4.72841	0.060174	0.0928901	14438.4	4.07435	3664	0.172617	9.57765	1.40471	1.55359	6.58355	3.0608	3.81551	2	65.9	1.20629	0.1699	0.140845
8	Heilongjiang	2021	0.314852	319.37	0.409665	61.3832	647.7	63.4608	0.158626	4.04972	0.0777564	0.0931298	14551.3	3.78958	4770	0.180419	9.58544	1.33225	1.39865	6.47343	3.1937	4.11741	2	75.7	1.19092	0.243	0.204044
8	Heilongjiang	2022	0.319108	333.03	0.404546	55.0357	578.8	64.3104	0.156811	3.81343	0.0567412	0.0917853	14683.2	3.61618	2100	0.192409	9.59446	1.28542	1.33853	6.36096	3.3303	4.00798	2	78.6	1.18863	0.2361	0.198631
9	Shanghai	2011	1.99963	80.19	0.475228	73.2224	1009.1	51.7365	0.298802	51.1458	5.09935	0.339491	186.3	15.7264	1067	0.322421	5.22736	2.75534	3.93468	6.91681	0.8019	4.29319	3	66.2	1.0111	0.2441	0.241419
9	Shanghai	2012	1.27439	150.77	0.495518	68.9432	1435.8	52.3371	0.28332	49.7556	5.38747	0.309358	187.6	14.9523	1187	0.350098	5.23431	2.70487	3.90712	7.26948	1.5077	4.23266	3	68.4	1.00766	0.2525	0.250582
9	Shanghai	2013	1.37519	222.14	0.470457	90.3393	1173.4	51.9822	0.285714	51.5134	23.1747	0.344553	168.5	13.2521	1340	0.334785	5.12694	2.58415	3.94184	7.06766	2.2214	4.50314	3	70.7	0.989577	0.3171	0.32044
9	Shanghai	2014	1.34911	239.53	0.497662	33.2829	1295.3	51.0385	0.284314	54.0246	24.8078	0.352941	164.9	13.1653	1377	0.381652	5.10534	2.57758	3.98944	7.1665	2.3953	3.50556	3	71.1	0.962894	0.3026	0.314261
9	Shanghai	2015	1.2055	278.11	0.536761	38.9885	1648.8	51.2221	0.291593	52.999	27.0191	0.393886	161.9	12.9336	1446	0.431366	5.08698	2.55983	3.97027	7.4078	2.7811	3.66356	3	73.1	0.962858	0.3883	0.403279
9	Shanghai	2016	1.94655	282.22	0.624827	78.9281	1596.1	48.7236	0.300527	56.1617	32.3641	0.450955	140.1	12.8374	1463	0.474773	4.94236	2.55236	4.02823	7.37532	2.8222	4.36818	3	74.1	0.932093	0.4685	0.502632
9	Shanghai	2017	1.28902	336.65	0.669451	81.7809	1199.6	50.0325	0.31239	54.9817	35.5634	0.508951	133.1	12.285	1775	0.489385	4.8911	2.50838	4.007	7.08974	3.3665	4.40428	3	75.5	0.942155	0.5098	0.5411
9	Shanghai	2018	1.26756	377.73	0.675807	94.6186	1408.8	51.8302	0.296493	52.3585	37.3156	0.464045	129.9	11.3355	2013	0.492893	4.86677	2.42794	3.95811	7.25049	3.7773	4.54966	3	76.8	0.95795	0.6456	0.673939
9	Shanghai	2019	1.41242	410.28	0.729791	53.2526	1404.4	51.1901	0.288064	50.5471	42.1591	0.497322	117.4	10.7116	2174	0.562486	4.76559	2.37132	3.92291	7.24737	4.1028	3.97594	3	78.2	0.960537	0.6824	0.710436
9	Shanghai	2020	1.40849	431.93	0.646849	70.3696	1555	49.3174	0.269984	50.4075	42.5999	0.5721	114.3	10.3605	2760	0.625462	4.73883	2.338	3.92014	7.34923	4.3193	4.25419	3	79.5	0.947071	0.9608	1.0145
9	Shanghai	2021	1.21922	453.75	0.624291	76.0752	1386.3	53.8951	0.249338	44.3133	0.428301	0.117291	117.4	9.02005	3545	0.679516	4.76559	2.19945	3.79128	7.23439	4.5375	4.33205	3	80.8	1.01141	1.2847	1.27021
9	Shanghai	2022	1.48788	475.79	0.596582	100.324	1044.1	54.5887	0.245171	44.5765	0.226597	0.111441	122.8	7.42942	3142	0.746974	4.81056	2.00545	3.79721	6.95091	4.7579	4.60841	3	89.8	1.00895	1.332	1.32018
10	Jiangsu	2011	0.280811	62.08	0.508484	48.9734	1012.1	50.2717	0.440038	13.8898	2.09681	0.130494	5319.2	11.2877	3181	0.187106	8.57908	2.42372	2.63115	6.91978	0.6208	3.89182	3	46.8	0.982476	0.4588	0.466983
10	Jiangsu	2012	0.31674	122.03	0.519171	58.3469	953.9	50.8884	0.432524	14.7093	2.21707	0.134612	5336.6	10.9389	5102	0.223849	8.58234	2.39232	2.68848	6.86056	1.2203	4.0656	3	50	0.979762	0.5562	0.567689
10	Jiangsu	2013	0.449016	180.98	0.498198	78.5205	833.4	51.2249	0.425361	15.2072	2.34507	0.138997	5360.8	10.568	6930	0.241436	8.58687	2.35783	2.72177	6.72551	1.8098	4.3631	3	51.7	0.97516	0.9065	0.929591
10	Jiangsu	2014	0.370021	204.16	0.51085	31.2451	1044.5	51.9413	0.421444	15.6078	2.38967	0.139999	5376.1	10.3534	8172	0.271623	8.58972	2.33732	2.74777	6.95129	2.0416	3.44042	3	53.8	0.979926	0.8529	0.870372
10	Jiangsu	2015	0.665411	244.01	0.513732	27.7811	1257.1	52.6601	0.413157	14.6214	2.37081	0.140219	5424.6	10.0839	8820	0.300466	8.5987	2.31094	2.68249	7.13656	2.4401	3.32504	3	55.5	0.989889	1.1728	1.18478
10	Jiangsu	2016	1.00111	253.75	0.530644	65.479	1410.5	51.03	0.409063	14.9139	2.44672	0.142279	5432.7	9.97395	9806	0.325158	8.60019	2.29998	2.7023	7.2517	2.5375	4.18205	3	56.6	0.976215	1.3461	1.3789
10	Jiangsu	2017	1.00202	297.69	0.546805	68.5356	1006.8	52.5711	0.402109	15.2301	2.49853	0.144249	5527.3	9.68715	10501	0.35026	8.61745	2.2708	2.72328	6.91453	2.9769	4.22683	3	57.5	0.989961	1.4322	1.44672
10	Jiangsu	2018	0.90163	334.02	0.555811	71.1846	1088.1	51.9297	0.388886	15.4336	2.5706	0.145475	5475.9	9.25507	12781	0.363799	8.60811	2.22517	2.73655	6.99219	3.3402	4.26549	3	58.4	0.959788	2.0773	2.16433
10	Jiangsu	2019	1.0208	361.93	0.565048	46.7319	798.5	51.0266	0.384556	15.3378	2.61886	0.14632	5381.5	9.05598	12106	0.3995	8.59072	2.20343	2.73032	6.68274	3.6193	3.84374	3	59.2	0.957468	2.2688	2.36958
10	Jiangsu	2020	1.09043	381.61	0.564924	51.2149	1236	51.5827	0.375415	14.9465	2.68902	0.145218	5405.6	8.7857	13395	0.432494	8.59519	2.17313	2.70448	7.11964	3.8161	3.93574	3	60	0.990572	3.4565	3.4894
10	Jiangsu	2021	1.10019	401.38	0.562214	66.2942	1190.3	53.4566	0.366709	14.0763	0.692297	0.1388	5427.5	8.4567	15494	0.479288	8.59923	2.13496	2.64449	7.08196	4.0138	4.19419	3	77.2	1.00318	4.5359	4.52153
10	Jiangsu	2022	1.12814	421.17	0.511229	81.9847	813.3	53.6502	0.358499	13.5383	0.719386	0.134454	5444.4	8.09641	12348	0.522003	8.60234	2.09142	2.60552	6.7011	4.2117	4.40653	3	75.5	0.991604	4.1507	4.18584
11	Zhejiang	2011	1.09192	77.39	0.642373	60.563	1417	45.0529	0.373858	23.7203	3.44338	0.79222	1254.1	25.9471	2327	0.188499	7.13417	3.25606	3.16633	7.2563	0.7739	4.10429	3	56.1	0.880484	0.3597	0.408525
11	Zhejiang	2012	1.03287	146.35	0.701933	55.9272	2088.1	45.7776	0.396481	26.7993	3.74266	0.844161	1251.6	27.0631	3631	0.241459	7.13218	3.29817	3.28838	7.64401	1.4635	4.02356	3	59	0.881363	0.4328	0.491057
11	Zhejiang	2013	0.545258	205.77	0.683357	64.8224	1590.2	46.6161	0.399801	27.9696	3.91414	0.859899	1253.7	26.9043	5021	0.23692	7.13385	3.29229	3.33112	7.37162	2.0577	4.17131	3	60.8	0.887424	0.6657	0.750149
11	Zhejiang	2014	1.00944	224.45	0.717431	29.6375	1771.77	48.2284	0.394107	28.8817	3.98127	0.882586	1266.8	25.8135	5121	0.255095	7.14425	3.2509	3.36321	7.47973	2.2445	3.38777	3	62.9	0.909878	0.6228	0.684487
11	Zhejiang	2015	0.422248	264.85	0.724113	27.3989	2060.6	48.4492	0.3821	29.4512	3.95355	0.887143	1277.8	24.6671	7175	0.305823	7.1529	3.20547	3.38273	7.63075	2.6485	3.31054	3	65.3	0.910733	0.9152	1.0049
11	Zhejiang	2016	1.08927	268.1	0.743046	68.9432	1953.8	47.8952	0.43401	34.5749	4.75772	1.04392	1255.4	25.4303	7610	0.334335	7.13521	3.23594	3.54313	7.57753	2.681	4.23266	3	65.6	0.916246	1.0236	1.11717
11	Zhejiang	2017	1.42059	318.05	0.729238	79.1064	1556.2	48.3128	0.417092	34.2693	4.92984	1.01762	977.2	23.3709	8120	0.339707	6.88469	3.15149	3.53425	7.35	3.1805	4.37071	3	64.8	0.909773	0.9854	1.08313
11	Zhejiang	2018	0.215536	357.45	0.728162	79.2847	1640.2	48.0785	0.392985	34.7354	5.09582	1.0047	975.7	22.0852	12568	0.361867	6.88316	3.09491	3.54776	7.40257	3.5745	4.37324	3	64.3	0.88861	1.4412	1.62186
11	Zhejiang	2019	0.169925	387.49	0.702849	52.5394	1950.3	47.5362	0.362573	33.3752	5.13468	0.952691	977.4	19.3039	9733	0.399933	6.8849	2.9603	3.50781	7.57574	3.8749	3.96081	3	64	0.891975	1.3371	1.49903
11	Zhejiang	2020	0.431103	406.88	0.702755	62.7026	1701	45.5816	0.345545	33.2053	5.15334	0.936212	993.4	18.1489	11732	0.430216	6.90113	2.89861	3.50271	7.43897	4.0688	4.13836	3	63.9	0.875329	1.8256	2.08562
11	Zhejiang	2021	0.562497	426.85	0.70272	63.0592	2003.1	47.4367	0.338827	34.591	2.10692	0.87809	1006.7	17.1563	12525	0.459974	6.91443	2.84236	3.54359	7.60245	4.2685	4.14472	3	84.2	0.890207	2.2493	2.52672
11	Zhejiang	2022	0.384979	447.19	0.604824	83.2073	1556	47.1657	0.330505	34.0371	2.83938	0.845501	1020.4	16.2786	9886	0.504524	6.92795	2.78985	3.52745	7.34987	4.4719	4.42134	3	76.5	0.871753	2.052	2.35388
12	Anhui	2011	0.051695	33.07	0.377713	47.547	1064.4	49.7575	0.36537	9.54394	0.12998	0.0780237	6621.5	13.0224	701	0.0611136	8.79808	2.56667	2.25591	6.97017	0.3307	3.86073	3	26.6	0.972427	0.1006	0.103453
12	Anhui	2012	0.0643769	96.63	0.383995	47.9036	1173.8	50.2907	0.371845	10.1644	0.143596	0.0802711	6622	13.0106	1331	0.0842273	8.79815	2.56576	2.3189	7.068	0.9663	3.86912	3	31.3	0.968255	0.1357	0.140149
12	Anhui	2013	0.142239	150.83	0.459752	73.0186	1023.4	50.1787	0.378287	10.6066	0.154702	0.0820515	6625.3	13.1685	2514	0.0953159	8.79865	2.57783	2.36147	6.93089	1.5083	4.29046	3	35.9	0.955244	0.2199	0.230203
12	Anhui	2014	0.106614	180.59	0.455959	28.1886	1278.5	50.3725	0.381633	10.749	0.164921	0.0820524	6628.9	12.7438	4351	0.114452	8.79919	2.54505	2.37481	7.15344	1.8059	3.33932	3	36.9	0.95033	0.2327	0.244862
12	Anhui	2015	0.203718	211.28	0.45845	22.6866	1362.8	49.7256	0.378403	10.9427	0.17513	0.0845763	6632.9	12.4015	7458	0.14093	8.7998	2.51782	2.39268	7.2173	2.1128	3.12236	3	39.4	0.934726	0.3237	0.346305
12	Anhui	2016	0.321804	228.78	0.504825	51.2149	1612.7	48.2147	0.372021	11.0313	0.183866	0.0861196	6644.5	12.0249	8783	0.159809	8.80155	2.48698	2.40073	7.38567	2.2878	3.93574	3	44.3	0.922359	0.3824	0.414589
12	Anhui	2017	0.330276	271.6	0.516134	57.1244	1255	48.7484	0.365224	11.1842	0.196306	0.0865161	7321.8	11.3903	10359	0.169338	8.89861	2.43276	2.4145	7.13489	2.716	4.0448	3	49.5	0.917974	0.3653	0.397941
12	Anhui	2018	0.433116	303.83	0.517413	61.8111	1314.7	48.2303	0.355486	11.1534	0.20612	0.0860781	7316.3	10.7398	12569	0.187277	8.89786	2.37396	2.41175	7.18136	3.0383	4.1239	3	54.4	0.891414	0.52	0.583343
12	Anhui	2019	0.347691	330.29	0.521619	54.6791	935.8	45.822	0.339353	11.8122	0.215384	0.0850604	7287	10.0547	6922	0.21274	8.89385	2.30804	2.46914	6.8414	3.3029	4.00186	3	59	0.859809	0.5098	0.592923
12	Anhui	2020	0.609794	350.16	0.522662	55.2904	1665.6	44.4545	0.328759	11.7146	0.232831	0.0852801	7289.5	9.44591	7414	0.234159	8.89419	2.24558	2.46083	7.41794	3.5016	4.01277	3	63.2	0.853685	0.7328	0.858396
12	Anhui	2021	0.718824	370.37	0.518612	62.4225	1291.6	46.682	0.320397	11.5458	0.315535	0.0837197	7309.6	8.55122	8729	0.264561	8.89694	2.14607	2.44632	7.16364	3.7037	4.13356	3	67.4	0.876043	1.0163	1.1601
12	Anhui	2022	1.47796	391.34	0.512246	80.3545	979.8	46.7824	0.313647	11.4176	0.342415	0.0826095	7314.2	8.1714	3654	0.286805	8.89757	2.10064	2.43515	6.88735	3.9134	4.38701	3	77.3	0.864668	1.0186	1.17802
13	Fujian	2011	0.663571	61.76	0.514899	65.0919	1356.7	39.2045	0.529049	25.2927	1.18374	0.371861	1226.8	25.5053	732	0.111481	7.11216	3.23889	3.23052	7.21281	0.6176	4.17592	3	57	0.766187	0.1055	0.137695
13	Fujian	2012	1.02966	123.21	0.549905	50.2572	2049.88	39.3681	0.53409	25.9343	1.3824	0.377358	1201.1	25.5402	952	0.134474	7.09099	3.24025	3.25557	7.62554	1.2321	3.918	3	61.3	0.757961	0.113	0.149084
13	Fujian	2013	0.90336	183.1	0.644713	65.0919	1626.2	39.138	0.526001	25.8066	1.51243	0.375185	1202.1	25.2159	1375	0.142443	7.09183	3.22748	3.25063	7.394	1.831	4.17592	3	64.1	0.745064	0.1681	0.225618
13	Fujian	2014	1.05421	202.59	0.668267	68.6579	1705	40.2706	0.531884	26.4324	1.59496	0.374371	1197.7	24.4664	1576	0.161032	7.08816	3.1973	3.27459	7.44132	2.0259	4.22975	3	65.5	0.759746	0.1598	0.210333
13	Fujian	2015	1.06447	245.21	0.656486	36.5636	1992.94	39.9665	0.531034	26.6233	1.63454	0.369751	1193.2	23.9351	2598	0.197173	7.08439	3.17535	3.28179	7.59737	2.4521	3.60005	3	69.6	0.751278	0.2755	0.366709
13	Fujian	2016	1.112	252.67	0.681411	67.2315	2432.6	38.964	0.799587	40.3048	2.48224	0.557206	1176.7	35.7696	3787	0.254285	7.07047	3.5771	3.69647	7.79672	2.5267	4.20767	3	69.7	0.74539	0.3931	0.527375
13	Fujian	2017	1.01532	299.28	0.687286	83.3499	1495.3	38.686	0.750791	40.2859	2.50681	0.539599	833.2	33.6926	3966	0.319159	6.72527	3.51728	3.696	7.31008	2.9928	4.42245	3	70.5	0.728492	0.3563	0.489092
13	Fujian	2018	1.15395	334.44	0.687994	72.3666	1940.18	39.0931	0.702086	38.041	2.56051	0.522412	833.5	31.1291	6259	0.322011	6.72563	3.43814	3.63866	7.57054	3.3444	4.28221	3	71.2	0.722536	0.5933	0.821135
13	Fujian	2019	1.19408	360.51	0.673286	67.9447	1730.7	38.2777	0.664416	36.5829	2.61314	0.507722	822.4	28.4499	4374	0.332453	6.71223	3.34815	3.59958	7.45628	3.6051	4.21804	3	71.8	0.718248	0.5025	0.69962
13	Fujian	2020	1.21521	380.13	0.680709	82.922	1439.1	37.0976	0.617973	31.7685	2.72831	0.480598	834.4	26.4593	5885	0.305519	6.72671	3.27561	3.45848	7.27177	3.8013	4.41763	3	72.4	0.712407	0.7922	1.11201
13	Fujian	2021	1.23727	400.26	0.672196	87.2012	1477.1	36.6474	0.584963	28.0308	1.8871	0.472184	835.1	25.237	5313	0.35392	6.72755	3.22831	3.3333	7.29784	4.0026	4.4682	3	73	0.687732	0.7304	1.06204
13	Fujian	2022	1.99536	420.96	0.50859	88.3424	1712.4	37.5404	0.54753	27.9413	1.64913	0.44706	837.6	23.7798	2190	0.374555	6.73054	3.16884	3.33011	7.44565	4.2096	4.48074	3	76.6	0.693851	0.7304	1.05268
14	Jiangxi	2011	1.07118	29.74	0.336735	51.541	12329	42.8097	0.256561	8.69541	0.140811	0.0479332	3650.1	18.1344	211	0.0346958	8.20251	2.89781	2.1628	9.41971	0.2974	3.94158	3	24.4	0.836643	0.0311	0.0371724
14	Jiangxi	2012	1.08237	91.93	0.340739	52.1115	21890	43.2524	0.255679	9.09971	0.153161	0.0499557	3675.9	18.1723	347	0.04505	8.20955	2.8999	2.20824	9.99379	0.9193	3.95316	3	28.5	0.832746	0.0367	0.044071
14	Jiangxi	2013	1.0914	146.13	0.354019	75.0767	14072	43.2749	0.25498	9.2571	0.163707	0.0527681	3690.9	17.9916	446	0.0508372	8.21363	2.8899	2.22539	9.55194	1.4613	4.31882	3	32.6	0.823817	0.055	0.0667624
14	Jiangxi	2014	1.19768	175.69	0.353176	42.5546	17514	43.8484	0.256476	9.53631	0.175245	0.0515214	3697.3	17.0182	547	0.0607947	8.21536	2.83428	2.25511	9.77076	1.7569	3.75185	3	34.1	0.827245	0.0596	0.0720464
14	Jiangxi	2015	1.09979	208.35	0.356456	28.5757	21151	48.4925	0.257353	9.67486	0.179097	0.0516212	3705.6	16.8307	896	0.0897044	8.2176	2.8232	2.26953	9.95944	2.0835	3.35341	3	38.7	0.911548	0.1045	0.11464
14	Jiangxi	2016	1.15065	223.76	0.3593	57.3892	19828	47.5289	0.250437	9.30639	0.18448	0.0490395	3686.2	16.2642	1601	0.107892	8.21235	2.78897	2.2307	9.89485	2.2376	4.05004	3	44.6	0.909238	0.147	0.161674
14	Jiangxi	2017	1.21275	267.17	0.361698	58.673	17387	48.5267	0.239372	9.48994	0.192427	0.0524962	3786.3	15.5538	1598	0.120841	8.23914	2.7443	2.25023	9.76348	2.6717	4.07244	3	50.4	0.913801	0.1485	0.162508
14	Jiangxi	2018	1.2634	296.23	0.365747	70.9401	15430	49.2039	0.22175	9.39883	0.202437	0.0556176	3721.3	13.8954	3055	0.146136	8.22183	2.63156	2.24058	9.64407	2.9623	4.26127	3	56.8	0.909409	0.2597	0.28557
14	Jiangxi	2019	1.36537	319.13	0.368787	66.0903	17828	46.6566	0.20932	9.42186	0.215968	0.0545171	3665.1	11.3562	2738	0.177015	8.20661	2.42977	2.24303	9.78853	3.1913	4.19117	3	64	0.875469	0.2729	0.311719
14	Jiangxi	2020	1.3998	340.61	0.361155	66.0903	19609	44.2291	0.192775	9.26511	0.230653	0.05315	3772.4	9.33811	3551	0.192265	8.23547	2.2341	2.22626	9.88374	3.4061	4.19117	3	71.9	0.849357	0.3509	0.413136
14	Jiangxi	2021	1.66743	362.96	0.35934	82.4941	15806	44.9292	0.191419	9.20094	0.294664	0.0527067	3772.8	9.10099	4245	0.201327	8.23557	2.20838	2.21931	9.66815	3.6296	4.4128	3	79.8	0.84315	0.4675	0.554468
14	Jiangxi	2022	1.9432	386.1	0.378065	79.2133	15677	45.3786	0.187942	9.42326	0.325452	0.0520024	3776.4	8.89975	3384	0.21032	8.23653	2.18602	2.24318	9.65995	3.861	4.37198	3	70.7	0.838722	0.3478	0.414679
15	Shandong	2011	0.520939	38.55	0.462482	44.5754	747.9	51.1145	0.435916	29.2964	0.420159	0.170449	7145.8	15.1674	2360	0.115038	8.87428	2.71915	3.37746	6.61727	0.3855	3.79773	3	37.8	0.998948	0.2714	0.271686
15	Shandong	2012	0.591627	100.35	0.465659	55.9866	650.8	48.9802	0.438263	29.268	0.428628	0.165271	7202.3	14.9075	3513	0.143001	8.88215	2.70187	3.37649	6.4782	1.0035	4.02535	3	40.1	0.943023	0.2951	0.31293
15	Shandong	2013	0.380149	159.3	0.424637	72.8658	681.7	50.5508	0.430615	29.0375	0.429449	0.159069	7294.6	14.431	5363	0.188011	8.89489	2.66938	3.36859	6.52459	1.593	4.28909	3	44.7	0.962327	0.4172	0.433533
15	Shandong	2014	1.03886	181.88	0.433163	52.064	518.8	50.6899	0.424066	27.6473	0.434902	0.152475	7440	14.1694	6781	0.193312	8.91463	2.65108	3.31953	6.25152	1.8188	3.95316	3	47.6	0.956318	0.4134	0.432283
15	Shandong	2015	1.00196	220.66	0.436203	47.9036	575.7	50.2224	0.420351	27.35	0.437401	0.150365	7492.1	13.6943	8890	0.222521	8.9216	2.61698	3.30872	6.35559	2.2066	3.86912	3	48.9	0.944066	0.6033	0.639044
15	Shandong	2016	0.445415	232.57	0.457606	65.6149	658.3	48.344	0.404713	26.4183	0.433423	0.144078	7511.5	13.1754	9034	0.237801	8.92419	2.57835	3.27406	6.48966	2.3257	4.18358	3	52.9	0.924833	0.752	0.81312
15	Shandong	2017	0.274928	272.06	0.467335	76.4318	635.8	48.1735	0.396082	25.8465	0.439736	0.141972	8455.6	12.6668	8931	0.243778	9.04258	2.53898	3.25218	6.45488	2.7206	4.33598	3	56.5	0.907149	0.7492	0.825884
15	Shandong	2018	0.340611	301.13	0.472699	78.4526	789.5	49.7825	0.379487	25.0014	0.375776	0.133161	8404.8	11.7272	10032	0.252595	9.03656	2.46191	3.21893	6.6714	3.0113	4.3631	3	60.3	0.920104	0.9481	1.03043
15	Shandong	2019	0.12129	327.36	0.482148	71.2016	558.9	50.8126	0.361599	24.4316	0.398716	0.125856	8312.8	11.0033	9235	0.257076	9.02555	2.39819	3.19588	6.32597	3.2736	4.26549	3	64.4	0.953454	0.9801	1.02795
15	Shandong	2020	0.224737	347.81	0.486136	51.4696	838.1	50.717	0.349781	24.3968	0.409235	0.116079	8281.5	10.4977	11388	0.277776	9.02178	2.35116	3.19445	6.73114	3.4781	3.94158	3	68.8	0.973948	1.5542	1.59577
15	Shandong	2021	1.06696	368.44	0.483496	62.2865	979.9	50.7024	0.338884	23.7179	0.463758	0.111612	8355.1	9.88528	14867	0.312462	9.03063	2.29105	3.16623	6.88745	3.6844	4.13196	3	73.2	0.951492	2.2208	2.33402
15	Shandong	2022	2.28065	389.83	0.475105	68.3488	878	51.1636	0.33026	23.1665	0.42247	0.106986	8372.2	9.57671	16400	0.342014	9.03267	2.25933	3.14271	6.77765	3.8983	4.22391	3	75.9	0.945644	2.2117	2.33883
16	Henan	2011	0.426841	28.4	0.358333	53.4309	736.2	58.6778	0.472494	10.6333	0.197649	0.0779179	9859.9	9.02613	834	0.039319	9.19623	2.20012	2.36399	6.6015	0.284	3.97781	4	27.5	1.14676	0.1231	0.107346
16	Henan	2012	0.551669	83.68	0.361832	60.3847	605.2	60.2045	0.479891	10.8797	0.203356	0.0787396	9985.2	8.99581	1185	0.0534513	9.20886	2.19676	2.3869	6.40556	0.8368	4.10099	4	30.4	1.15913	0.123	0.106114
16	Henan	2013	0.578874	142.08	0.340665	85.8818	576.6	59.4711	0.486173	11.7146	0.21323	0.0791706	10081.8	9.08298	1438	0.0632224	9.21849	2.2064	2.46083	6.35715	1.4208	4.45318	4	34.9	1.13214	0.1832	0.161817
16	Henan	2014	1.03234	166.65	0.346274	41.3065	725.9	60.7256	0.490844	11.3697	0.217849	0.0806771	10209.8	9.03445	1831	0.0761335	9.2311	2.20105	2.43095	6.58741	1.6665	3.72086	4	36.9	1.14565	0.1929	0.168376
16	Henan	2015	1.21306	205.34	0.350184	33.9961	704.1	61.6982	0.496423	11.2306	0.222537	0.0795147	10267.2	8.92201	2789	0.0955378	9.23671	2.18852	2.41864	6.55692	2.0534	3.52636	4	39.2	1.15978	0.2648	0.228318
16	Henan	2016	0.334884	223.12	0.35181	58.6017	787.1	60.2166	0.479799	10.9476	0.212867	0.0754226	10286.2	8.52866	2838	0.113371	9.23856	2.14343	2.39312	6.66836	2.2312	4.07073	4	43.4	1.15196	0.3035	0.263465
16	Henan	2017	0.213296	266.92	0.357958	66.6253	827.77	60.2005	0.479688	10.6769	0.223194	0.0738503	10915.1	8.19277	3952	0.124503	9.2979	2.10325	2.36809	6.71873	2.6692	4.19871	4	47.3	1.13363	0.3326	0.293394
16	Henan	2018	1.02964	295.76	0.357746	76.6101	755	64.1108	0.468627	10.3385	0.223622	0.0702815	10906.1	7.68429	6114	0.137551	9.29708	2.03918	2.33587	6.62672	2.9576	4.3386	4	51.6	1.18493	0.5467	0.461379
16	Henan	2019	0.200236	322.12	0.362169	74.4705	875.9	63.3193	0.453119	10.2462	0.240472	0.0680304	10734.5	7.28558	5092	0.159332	9.28122	1.9859	2.3269	6.77525	3.2212	4.3108	4	56.2	1.18813	0.5693	0.479156
16	Henan	2020	0.328541	340.81	0.371941	57.5319	874.3	62.7222	0.441163	10.3293	0.254065	0.0663126	10738.8	6.97168	5774	0.171776	9.28162	1.94186	2.33499	6.77342	3.4081	4.05178	4	61.2	1.20449	0.7586	0.62981
16	Henan	2021	0.236929	360.18	0.371511	61.6328	1127.7	62.515	0.424791	9.54444	0.306989	0.0648074	10772.3	6.62573	7421	0.18756	9.28473	1.89096	2.25596	7.02794	3.6018	4.12066	4	91.9	1.17317	1.0393	0.885891
16	Henan	2022	0.189285	380.15	0.382232	86.7733	622	63.442	0.404649	9.51636	0.343609	0.0647113	10778.4	6.25361	3075	0.202474	9.2853	1.83316	2.25301	6.43294	3.8015	4.46361	4	75.7	1.17258	0.8335	0.710823
17	Hubei	2011	0.176334	39.82	0.329403	51.9847	1041.4	54.6098	0.443081	8.12076	0.140157	0.0771574	4122.1	17.4166	642	0.0785258	8.32412	2.85742	2.09442	6.94832	0.3982	3.95124	4	37.2	1.06726	0.1065	0.0997885
17	Hubei	2012	0.0975233	101.42	0.331699	66.0903	1045.1	53.1983	0.43928	8.0511	0.138955	0.0764956	4180.1	17.2672	787	0.0931393	8.33809	2.84881	2.08581	6.95187	1.0142	4.19117	4	40.1	1.02424	0.1112	0.108569
17	Hubei	2013	0.105808	164.76	0.361055	76.0752	1180.2	52.5423	0.434149	8.18016	0.160544	0.0810491	4258.4	15.6917	1176	0.100316	8.35665	2.75313	2.10171	7.07344	1.6476	4.33205	4	43.1	1.00024	0.177	0.176958
17	Hubei	2014	0.216067	190.14	0.36647	28.5282	1130.7	51.3498	0.429311	8.52853	0.175326	0.0829604	4370.4	15.5443	1263	0.11377	8.38261	2.74369	2.14342	7.03059	1.9014	3.3499	4	45.3	0.968768	0.1848	0.190758
17	Hubei	2015	0.175313	226.75	0.363146	30.1131	1177	49.6381	0.419836	8.96849	0.187491	0.0824908	4466	15.1778	1669	0.139501	8.40425	2.71983	2.19372	7.07072	2.2675	3.40453	4	46.8	0.933082	0.2589	0.277467
17	Hubei	2016	0.256675	239.86	0.367398	55.7885	1423.4	47.6603	0.414693	8.51059	0.193286	0.0833281	4436.9	14.8448	1984	0.147247	8.39771	2.69765	2.14131	7.2608	2.3986	4.02177	4	51.4	0.911753	0.314	0.344392
17	Hubei	2017	0.304052	285.28	0.366908	54.6791	1309.5	48.3299	0.399605	8.27994	0.196792	0.0833323	4853	13.7756	2671	0.160674	8.48735	2.6229	2.11383	7.1774	2.8528	4.00186	4	58.5	0.910095	0.3513	0.386004
17	Hubei	2018	0.472651	319.48	0.368658	77.6601	1072.2	48.8699	0.371965	7.9913	0.207736	0.0818569	4847	12.989	4303	0.174182	8.48611	2.5641	2.07835	6.97747	3.1948	4.35285	4	65.3	0.903236	0.4934	0.546258
17	Hubei	2019	0.485878	344.4	0.379866	71.0035	893.5	48.7567	0.350427	7.52325	0.228445	0.0812446	4608.6	12.4106	3581	0.203677	8.43568	2.51855	2.018	6.79515	3.444	4.26268	4	71.9	0.914876	0.5	0.546522
17	Hubei	2020	0.293688	358.64	0.386994	47.0716	1642.6	47.8192	0.335223	7.27817	0.234337	0.078752	4645.3	11.6803	3902	0.225435	8.44361	2.4579	1.98488	7.40404	3.5864	3.85227	4	78.1	0.918299	0.507	0.552108
17	Hubei	2021	0.661622	373.69	0.380555	58.9583	1269	47.1584	0.323854	7.0621	0.251024	0.0769496	4686	11.1562	4616	0.242323	8.45233	2.412	1.95474	7.14598	3.7369	4.07754	4	73	0.884984	0.7486	0.845891
17	Hubei	2022	1.00232	388.8	0.391704	93.6676	987.2	46.9064	0.314945	6.95809	0.283695	0.0750742	4689	10.3761	4704	0.264649	8.45297	2.3395	1.9399	6.89487	3.888	4.5401	4	72.7	0.866959	1.0913	1.25877
18	Hunan	2011	0.0586399	32.68	0.337783	55.7165	1025.91	50.836	0.28861	8.77517	0.126196	0.0470126	4879.6	14.3299	576	0.0565279	8.49282	2.66235	2.17193	6.93333	0.3268	4.01998	4	29.5	0.993505	1.1234	1.13074
18	Hunan	2012	0.100076	93.71	0.327217	45.8613	1600.7	51.3726	0.292661	9.34409	0.129501	0.0476979	4908	14.4504	917	0.0715597	8.49862	2.67072	2.23475	7.3782	0.9371	3.82646	4	33.3	0.989085	0.0946	0.095644
18	Hunan	2013	0.156139	147.71	0.369259	76.4642	1271.6	50.9296	0.286925	9.5268	0.137087	0.0482081	4936.6	14.3699	1228	0.0775966	8.50443	2.66514	2.25411	7.14803	1.4771	4.33729	4	36.3	0.969538	0.11	0.113456
18	Hunan	2014	0.211444	167.27	0.36931	35.0983	1411.9	50.7918	0.282731	9.46386	0.141286	0.0486052	4975.1	14.1822	1212	0.0940665	8.5122	2.65199	2.24748	7.25269	1.6727	3.5582	4	38.6	0.95824	0.1661	0.173339
18	Hunan	2015	0.279859	206.38	0.37262	26.0212	1580.5	49.6748	0.282827	9.63508	0.142148	0.0500172	4944.7	14.0415	1736	0.114647	8.50607	2.64202	2.26541	7.3655	2.0638	3.2581	4	39.9	0.933773	0.167	0.178844
18	Hunan	2016	0.311592	217.69	0.375516	51.5669	1611.9	49.1444	0.295438	10.1515	0.151891	0.0523887	4890.6	14.2301	2014	0.136816	8.49507	2.65536	2.31763	7.38517	2.1769	3.94352	4	44.4	0.940145	0.2322	0.246983
18	Hunan	2017	0.389788	261.12	0.37802	48.0656	1439	49.8253	0.294713	10.239	0.154482	0.0531122	4978.9	13.939	2958	0.153595	8.51296	2.63469	2.3262	7.2717	2.6112	3.87328	4	48	0.938253	0.2476	0.263895
18	Hunan	2018	1.0239	286.81	0.390083	62.4594	1345.6	49.6921	0.299109	10.5284	0.161285	0.0549864	4747.9	14.0795	3467	0.165889	8.46546	2.64472	2.35408	7.2046	2.8681	4.13517	4	51.9	0.918432	0.2756	0.300077
18	Hunan	2019	1.31123	310.85	0.391012	57.5319	1463.7	47.6508	0.281935	10.3157	0.163712	0.0551534	4616.4	12.9881	4243	0.191581	8.43737	2.56404	2.33366	7.28872	3.1085	4.05178	4	56.2	0.894124	0.3553	0.397372
18	Hunan	2020	1.07272	332.03	0.380101	52.6043	1646.8	44.7922	0.266342	9.88143	0.160343	0.0538089	4754.8	12.0772	4529	0.205462	8.46691	2.49132	2.29066	7.40659	3.3203	3.96272	4	60.7	0.86017	0.3623	0.421196
18	Hunan	2021	1.13444	353.67	0.375445	84.7634	1490	46.1068	0.257587	9.30047	0.389485	0.0540903	4758.4	10.7139	5186	0.220096	8.46767	2.37154	2.23007	7.30653	3.5367	4.4403	4	65.2	0.865249	0.5042	0.582722
18	Hunan	2022	1.291	375.62	0.334749	85.5415	1305.3	48.6906	0.251295	8.61316	0.38701	0.054938	4765.5	9.54432	4452	0.238247	8.46916	2.25595	2.15329	7.17419	3.7562	4.44852	4	74.6	0.899937	0.6528	0.725384
19	Guangdong	2011	0.458877	69.48	0.441291	62.667	1461	44.4043	0.527778	9.63145	2.48233	0.169291	2530.4	24.9563	1547	0.167681	7.83613	3.21712	2.26503	7.28688	0.6948	4.13836	5	60.4	0.867807	0.6327	0.729079
19	Guangdong	2012	1.01198	127.06	0.441208	47.8323	1979.3	45.2918	0.530024	9.59694	2.56502	0.163297	2540.2	24.6026	2091	0.195313	7.84	3.20285	2.26144	7.5905	1.2706	3.86703	5	63.1	0.872012	0.4243	0.486576
19	Guangdong	2013	0.547624	184.78	0.423812	40.1297	2179.3	46.4314	0.519167	9.74458	2.62838	0.160278	2507.6	23.435	2760	0.209154	7.82708	3.15423	2.27671	7.68676	1.8478	3.69138	5	66	0.883907	0.4689	0.530486
19	Guangdong	2014	1.0113	201.53	0.41915	76.8359	1691.2	46.6421	0.525996	9.73803	2.76929	0.163544	2507	23.7518	3036	0.220974	7.82684	3.16766	2.27604	7.43319	2.0153	4.34121	5	68.5	0.879951	0.6952	0.790044
19	Guangdong	2015	0.310803	240.95	0.422277	62.667	1875.7	46.9527	0.536	9.78013	2.77175	0.164483	2505.8	23.7841	4133	0.245072	7.82636	3.16902	2.28035	7.53674	2.4095	4.13836	5	72.4	0.882604	0.6996	0.792655
19	Guangdong	2016	1.00153	248	0.423696	64.6639	2357.6	47.5078	0.624211	10.8822	3.19203	0.191075	2509.3	27.1905	5513	0.264158	7.82776	3.30287	2.38713	7.7654	2.48	4.16976	5	74	0.908835	1.0307	1.13409
19	Guangdong	2017	0.0256881	296.17	0.419777	72.9371	1739.2	48.4093	0.610999	10.8497	3.34659	0.183797	2169.7	26.7297	7958	0.276584	7.68234	3.28578	2.38413	7.46118	2.9617	4.28909	5	76.2	0.911589	1.1944	1.31024
19	Guangdong	2018	0.155766	331.92	0.414831	61.621	1843.1	48.9001	0.540543	10.472	3.3722	0.206805	2151	21.8956	11445	0.32378	7.67369	3.08629	2.34871	7.5192	3.3192	4.12066	5	78.4	0.903795	1.5661	1.7328
19	Guangdong	2019	0.33167	360.61	0.406988	67.0413	1993.6	49.1954	0.518176	10.0615	3.32317	0.196218	2160.6	20.0808	8823	0.35578	7.67814	2.99976	2.30872	7.5977	3.6061	4.20469	5	80.5	0.923108	2.3488	2.54445
19	Guangdong	2020	0.451722	379.53	0.399042	82.2563	1574.1	47.7006	0.493733	9.55973	3.29633	0.192731	2204.7	18.6929	11836	0.381195	7.69835	2.92814	2.25756	7.36144	3.7953	4.41037	5	82.6	0.916021	3.096	3.37983
19	Guangdong	2021	1.14534	398.84	0.394918	100.895	1420.9	47.5706	0.473213	9.56496	1.53477	0.189845	2213	17.215	16651	0.416514	7.70211	2.84578	2.25811	7.25905	3.9884	4.61413	5	76.6	0.892719	4.1872	4.69039
19	Guangdong	2022	0.584103	418.34	0.342638	68.5356	2114.3	48.4487	0.458329	9.88251	1.23971	0.188866	2230.3	16.6905	7421	0.458893	7.70989	2.81484	2.29077	7.65648	4.1834	4.22683	5	76.7	0.895465	3.8541	4.30402
20	Guangxi	2011	0.0327599	33.89	0.259198	62.7621	1300.86	48.2185	0.404753	6.23747	0.093688	0.0997248	3072.8	11.0398	314	0.0341671	8.03035	2.4015	1.83058	7.17078	0.3389	4.13995	5	29.4	0.94235	0.0223	0.0236642
20	Guangxi	2012	0.0293079	89.35	0.255343	54.9168	1670.9	49.3881	0.40943	6.52665	0.104084	0.101437	3069.1	11.1465	743	0.0455355	8.02914	2.41113	1.87589	7.42112	0.8935	4.00551	5	34.2	0.950877	0.0293	0.0308136
20	Guangxi	2013	0.164004	141.46	0.261068	51.7074	1692.5	49.7525	0.41664	6.75862	0.111419	0.103141	3076	11.2429	1339	0.0506424	8.03139	2.41974	1.91082	7.43396	1.4146	3.94546	5	37.9	0.94713	0.0506	0.0534246
20	Guangxi	2014	0.087934	166.12	0.273269	58.6017	1638.8	50.5095	0.43623	7.4347	0.128518	0.109108	3067.7	12.1419	2337	0.0625444	8.02868	2.49666	2.00616	7.40172	1.6612	4.07073	5	39.4	0.952915	0.0698	0.0732489
20	Guangxi	2015	0.192215	207.23	0.2663	55.8677	1943	51.1391	0.42359	7.54332	0.136779	0.105629	3059.3	12.2092	5535	0.0755517	8.02594	2.50219	2.02066	7.57199	2.0723	4.02356	5	42.8	0.961298	0.0898	0.0934154
20	Guangxi	2016	0.2422	223.32	0.275874	64.5451	1660.2	51.3618	0.439338	8.11923	0.159837	0.106592	3023.6	14.363	4718	0.0915364	8.0142	2.66466	2.09423	7.41469	2.2332	4.16667	5	46.1	0.982563	0.1101	0.112054
20	Guangxi	2017	0.318428	261.94	0.279716	45.764	1809.9	54.0333	0.441934	7.98891	0.17342	0.095144	2853.1	12.1443	7681	0.0977289	7.95616	2.49686	2.07805	7.50103	2.6194	3.82428	5	49.4	1.0175	0.1069	0.105062
20	Guangxi	2018	0.344085	289.25	0.285796	48.498	1517	55.3544	0.427048	7.9022	0.18125	0.0882392	2802.1	11.6704	6372	0.111082	7.93813	2.45705	2.06714	7.32449	2.8925	3.88156	5	52.6	1.02309	0.1542	0.150721
20	Guangxi	2019	0.359245	309.91	0.286028	57.7697	1609	56.4171	0.420824	7.9438	0.211163	0.0891605	2747	11.3705	3460	0.130988	7.91826	2.43102	2.07239	7.38337	3.0991	4.05699	5	55.8	1.05862	0.1477	0.139522
20	Guangxi	2020	0.308999	325.17	0.283435	71.2016	1630.1	55.279	0.405826	7.97603	0.231362	0.0864539	2806.1	10.811	3158	0.141213	7.93955	2.38056	2.07644	7.3964	3.2517	4.26549	5	58.9	1.06155	0.1866	0.17578
20	Guangxi	2021	0.418717	340.66	0.28021	81.6621	1335.3	56.5682	0.407754	7.3499	0.383375	0.0812626	2822.9	10.3979	4052	0.146035	7.94552	2.3416	1.99469	7.19691	3.4066	4.40305	5	62	1.06157	0.2744	0.258485
20	Guangxi	2022	0.463866	357.15	0.247058	55.3923	1651.2	57.328	0.397359	7.33489	0.338043	0.0778136	2829.3	9.88615	2033	0.165187	7.94778	2.29114	1.99264	7.40926	3.5715	4.01458	5	73.9	1.05958	0.2552	0.24085
21	Hainan	2011	1.17155	45.56	0.316347	49.3809	2273.3	39.8838	0.569367	23.1262	0.0843373	0.271979	430.6	55.9466	140	0.0416304	6.06518	4.0244	3.14097	7.72899	0.4556	3.89995	5	38.9	0.779462	0.0026	0.00333563
21	Hainan	2012	1.02827	102.94	0.326417	43.6753	1939.9	42.4508	0.532764	25.0339	0.100515	0.25743	438.6	46.3375	256	0.0525628	6.08359	3.83595	3.22023	7.57039	1.0294	3.77735	5	43.7	0.817312	0.0047	0.00575056
21	Hainan	2013	1.20445	158.26	0.337782	38.581	2393.7	42.2806	0.560835	27.5088	0.113535	0.260552	421.8	51.2851	356	0.0581303	6.04453	3.9374	3.31451	7.7806	1.5826	3.65325	5	46.4	0.804889	0.0121	0.0150331
21	Hainan	2014	1.32907	179.62	0.333487	73.6299	1993	45.2858	0.575384	32.6896	0.126687	0.267566	394	46.4169	360	0.0751811	5.97635	3.83766	3.48706	7.5974	1.7962	4.29864	5	47.6	0.854364	0.0103	0.0120558
21	Hainan	2015	1.28569	230.33	0.348502	84.8375	1403.5	46.2674	0.604992	38.3686	0.154028	0.256714	375.6	47.0839	471	0.0951811	5.92852	3.85193	3.64724	7.24672	2.3033	4.4403	5	51.6	0.869721	0.0129	0.0148324
21	Hainan	2016	1.32244	231.56	0.396161	77.7055	2341.5	47.1839	0.691625	36.4858	0.18978	0.271895	360.4	46.4544	452	0.115516	5.88722	3.83847	3.59692	7.75855	2.3156	4.35285	5	51.6	0.902638	0.0173	0.019166
21	Hainan	2017	1.40955	275.64	0.407716	56.9205	2062.2	47.5142	0.723992	38.9651	0.218776	0.228362	282.5	47.082	538	0.131302	5.64368	3.85189	3.66267	7.63153	2.7564	4.0413	5	52.7	0.894734	0.0176	0.0196706
21	Hainan	2018	1.31961	309.72	0.40744	26.9659	2095.9	47.5025	0.678496	35.8241	0.244214	0.288961	286.1	32.5431	596	0.138562	5.65634	3.48257	3.57862	7.64774	3.0972	3.29584	5	53.8	0.877963	0.0312	0.0355368
21	Hainan	2019	1.53042	328.75	0.429773	60.9961	1594.4	48.5131	0.684117	45.1789	0.27625	0.23218	272.6	31.6474	839	0.175217	5.60801	3.45466	3.81063	7.37425	3.2875	4.11087	5	54.8	0.910305	0.0421	0.0462482
21	Hainan	2020	1.92347	344.05	0.431714	73.8338	1641.1	48.0396	0.629487	45.1765	0.309647	0.221598	270.7	29.1727	1211	0.170862	5.60101	3.37323	3.81058	7.40312	3.4405	4.30136	5	55.7	0.922531	0.0678	0.0734934
21	Hainan	2021	2.02161	359.83	0.426694	60.1809	1881.4	52.0928	0.595356	50.0088	0.914866	0.200058	271.4	27.3496	2062	0.191466	5.60359	3.3087	3.9122	7.53977	3.5983	4.09767	5	83.1	0.977583	0.1115	0.114057
21	Hainan	2022	2.05139	375.98	0.480501	53.864	2068.6	54.4366	0.5617	50.9313	0.670838	0.196449	273	26.1932	1144	0.206745	5.60947	3.2655	3.93048	7.63463	3.7598	3.98713	5	69.7	1.00614	0.1122	0.111515
22	Chongqing	2011	0.300059	41.89	0.214795	71.796	992.8	59.5668	0.280039	11.5238	0.206176	0.0503941	2259.4	5.94767	553	0.0653046	7.72286	1.783	2.44442	6.90053	0.4189	4.27388	6	37	1.16413	0.0748	0.0642538
22	Chongqing	2012	0.418737	100.02	0.211718	53.2526	1104.4	60.3598	0.276102	11.7687	0.212209	0.0546338	2259.6	5.60715	942	0.0776928	7.72294	1.72404	2.46544	7.00706	1.0002	3.97594	6	40.9	1.16212	0.0951	0.0818333
22	Chongqing	2013	1.01343	159.86	0.20346	76.0752	1026.9	60.32	0.274866	12.1903	0.216502	0.0614352	2253.9	5.23337	1104	0.0885479	7.72042	1.65505	2.50064	6.9343	1.5986	4.33205	6	43.9	1.1483	0.1186	0.103283
22	Chongqing	2014	1.00999	184.71	0.205943	38.0375	1452.1	61.007	0.274715	12.3783	0.22119	0.0635521	2242.5	5.19715	1491	0.104427	7.71535	1.64811	2.51594	7.28077	1.8471	3.63759	6	45.7	1.15096	0.1138	0.0988739
22	Chongqing	2015	0.114239	221.84	0.207528	42.7923	880.2	59.8508	0.273282	12.6298	0.218525	0.0598467	2234	5.08977	2721	0.128076	7.71155	1.62723	2.53606	6.78015	2.2184	3.75654	6	48.3	1.12506	0.1847	0.164169
22	Chongqing	2016	0.283019	233.89	0.207195	66.5658	1348	60.6951	0.28844	13.5804	0.236087	0.0648045	2250.1	5.28037	3849	0.150811	7.71873	1.664	2.60862	7.20638	2.3389	4.19871	6	51.6	1.16111	0.2257	0.194383
22	Chongqing	2017	0.173455	276.31	0.20789	47.0716	1228.7	61.2725	0.285843	13.618	0.240089	0.0649778	2030.7	5.24015	3456	0.171604	7.61614	1.65635	2.61139	7.11371	2.7631	3.85227	6	54.7	1.15381	0.2101	0.182092
22	Chongqing	2018	1.13336	301.53	0.208136	71.796	1185.7	62.9835	0.278244	13.3269	0.237509	0.0639092	2017.8	5.13663	3295	0.191601	7.60976	1.6364	2.58978	7.07809	3.0153	4.27388	6	57.2	1.16409	0.2673	0.229621
22	Chongqing	2019	0.0223183	325.47	0.208528	53.2526	1406.4	59.7777	0.27223	12.7205	0.241803	0.0633649	1999.3	4.9317	2613	0.213581	7.60055	1.59569	2.54322	7.24879	3.2547	3.97594	6	59.4	1.12168	0.2412	0.215035
22	Chongqing	2020	0.0387673	344.76	0.207061	49.4488	1182.9	58.0611	0.26636	12.2043	0.244655	0.0631579	2003.1	4.80504	2429	0.228608	7.60245	1.56967	2.50179	7.07572	3.4476	3.89995	6	61.1	1.11498	0.3198	0.286821
22	Chongqing	2021	0.39262	364.94	0.204822	55.63	1216.2	59.9489	0.261197	12.0726	0.25099	0.0624762	2013.2	4.70419	3182	0.248177	7.60748	1.54845	2.49094	7.10349	3.6494	4.01818	6	62.8	1.12501	0.4432	0.393951
22	Chongqing	2022	0.159382	385.67	0.192555	84.6337	1082.4	61.3284	0.254958	11.785	0.254096	0.0612245	2046.7	4.59902	2395	0.269254	7.62398	1.52584	2.46683	6.98694	3.8567	4.43793	6	74	1.13352	0.411	0.362588
23	Sichuan	2011	0.0531345	40.16	0.282218	72.4443	890.9	49.7546	0.262639	12.7778	0.155317	0.0453709	6440.5	6.4711	784	0.0343506	8.77036	1.86735	2.54771	6.79223	0.4016	4.28221	6	27.7	0.97237	0.1338	0.137602
23	Sichuan	2012	0.0492225	100.13	0.285705	58.699	1033.2	50.8897	0.262017	13.1332	0.161499	0.0474267	6468.2	6.24418	1066	0.0607922	8.77465	1.83165	2.57514	6.94042	1.0013	4.07244	6	31.8	0.979789	0.145	0.147991
23	Sichuan	2013	0.168775	153.04	0.279196	80.938	1060.1	51.3584	0.259383	13.2051	0.168877	0.0478197	6469.9	6.19694	1711	0.0707748	8.77492	1.82405	2.5806	6.96612	1.5304	4.39321	6	35.1	0.977701	0.2587	0.2646
23	Sichuan	2014	0.170582	173.82	0.284326	62.2001	926.1	52.1155	0.258765	13.4728	0.175382	0.0481973	6467.4	6.1436	1886	0.0865608	8.77453	1.81541	2.60067	6.83098	1.7382	4.13035	6	37.3	0.983214	0.2258	0.229655
23	Sichuan	2015	0.20124	215.48	0.289395	51.1779	894.6	51.9848	0.257825	13.64	0.180404	0.0484009	6453.9	6.07849	2521	0.111949	8.77244	1.80476	2.613	6.79638	2.1548	3.93574	6	40	0.977195	0.3284	0.336064
23	Sichuan	2016	0.202895	225.41	0.296356	75.8807	921.3	54.3008	0.262255	13.9443	0.192842	0.0494007	6453.9	6.10925	3235	0.125209	8.77244	1.8098	2.63507	6.82579	2.2541	4.32942	6	43.6	1.03879	0.4184	0.402778
23	Sichuan	2017	0.214408	267.8	0.300061	68.23	941.4	57.5684	0.252687	13.6806	0.196802	0.0487723	6292	5.82762	4483	0.139381	8.74703	1.76261	2.61598	6.84737	2.678	4.22244	6	47.5	1.08406	0.4192	0.386693
23	Sichuan	2018	0.208833	294.3	0.304986	81.5863	1050.3	57.7253	0.244621	12.4995	0.206567	0.0487764	6265.6	5.33525	7066	0.159523	8.74283	1.67433	2.52569	6.95683	2.943	4.40183	6	51.6	1.06691	0.6154	0.576809
23	Sichuan	2019	0.331351	317.11	0.304766	69.6564	953.2	55.7085	0.229826	12.7138	0.212318	0.0484886	6279.3	4.77664	4392	0.184578	8.74501	1.56374	2.54269	6.85982	3.1711	4.2442	6	55.7	1.04532	0.5586	0.534381
23	Sichuan	2020	0.37908	334.82	0.303784	68.6839	1055	51.0164	0.214033	12.0629	0.209048	0.0478177	6312.6	4.2772	4303	0.202952	8.7503	1.4533	2.49013	6.9613	3.3482	4.22975	6	59.9	0.979698	0.7425	0.757886
23	Sichuan	2021	0.406832	353.15	0.299223	71.0828	1004.7	54.2397	0.207162	11.6969	0.273153	0.0470005	6357.7	4.09744	5422	0.214533	8.75742	1.41036	2.45933	6.91244	3.5315	4.26409	6	64.1	1.01787	0.9894	0.972028
23	Sichuan	2022	0.461925	371.57	0.290954	82.1051	842.7	56.0742	0.199855	11.2443	0.28717	0.0458572	6463.5	3.91106	5143	0.218903	8.77393	1.36381	2.41986	6.73661	3.7157	4.40794	6	71.1	1.03641	0.8765	0.845711
24	Guizhou	2011	0.0856091	18.47	0.240329	73.2224	820.6	56.2026	0.187366	8.1369	0.0955748	0.0193181	3055.6	2.88776	181	0.0188703	8.02473	1.06048	2.09641	6.71004	0.1847	4.29319	6	24.2	1.09839	0.0191	0.0173892
24	Guizhou	2012	0.0695723	75.87	0.233525	43.4262	1117.1	60.1828	0.189411	8.50142	0.105076	0.0196801	3054.3	2.79766	304	0.0280534	8.02431	1.02878	2.14023	7.01849	0.7587	3.77046	6	28.6	1.15871	0.0246	0.0212305
24	Guizhou	2013	0.138096	121.22	0.172007	73.0639	981.9	59.9439	0.180739	8.81152	0.114822	0.0202223	3118.4	2.50459	469	0.0359964	8.04508	0.918126	2.17606	6.88949	1.2122	4.29183	6	32.9	1.14114	0.0425	0.0372434
24	Guizhou	2014	0.151981	154.62	0.178174	52.4601	1273.3	62.3836	0.183613	8.8732	0.129194	0.0197589	3138.4	2.42908	705	0.0445606	8.05147	0.887511	2.18303	7.14937	1.5462	3.96081	6	34.9	1.17693	0.0471	0.0400193
24	Guizhou	2015	0.146839	193.29	0.192563	36.6111	1362	64.7123	0.187092	8.91397	0.144564	0.0198477	3114.9	2.47194	1296	0.0586748	8.04395	0.905004	2.18762	7.21671	1.9329	3.60005	6	38.4	1.21644	0.0711	0.0584491
24	Guizhou	2016	0.205455	209.45	0.194132	60.8601	1268.8	60.8559	0.184966	9.1088	0.152102	0.0199829	3113.3	2.44433	1900	0.0720871	8.04344	0.893772	2.20924	7.14583	2.0945	4.10923	6	43.2	1.16419	0.0653	0.0560906
24	Guizhou	2017	0.208459	251.46	0.196863	59.7508	1239.4	60.8399	0.169011	9.03601	0.168057	0.0201435	3052.8	2.36774	3262	0.084691	8.02381	0.861937	2.20122	7.12238	2.5146	4.09101	6	48.4	1.14567	0.0773	0.0674715
24	Guizhou	2018	0.257084	276.91	0.20672	66.4073	1233	63.2324	0.163368	10.0472	0.179672	0.0202658	2740.2	2.02658	4028	0.0995016	7.91579	0.706351	2.3073	7.11721	2.7691	4.1957	6	54	1.16869	0.1271	0.108754
24	Guizhou	2019	0.245715	293.51	0.210522	67.8337	1257.1	65.2015	0.151744	8.04893	0.19144	0.0206144	2709.4	1.67834	2755	0.122924	7.90448	0.517806	2.08554	7.13656	2.9351	4.21656	6	59.9	1.22345	0.1366	0.111652
24	Guizhou	2020	0.212953	307.94	0.212861	76.2337	1447.9	63.823	0.143883	8.29379	0.213924	0.0197249	2754.1	1.53836	2395	0.132158	7.92085	0.430719	2.11551	7.27787	3.0794	4.33336	6	66.1	1.22563	0.1811	0.147761
24	Guizhou	2021	1.01495	322.6	0.214922	84.7922	1218	66.5757	0.14011	8.15505	0.309705	0.0191779	2787.7	1.29967	2596	0.163844	7.93297	0.262113	2.09864	7.10496	3.226	4.4403	6	71.1	1.24937	0.2053	0.164323
24	Guizhou	2022	1.14877	338.01	0.22114	77.8186	1014.2	67.5067	0.140685	7.2768	0.306372	0.0194048	2788.7	1.30609	989	0.172384	7.93333	0.267039	1.98469	6.92185	3.3801	4.35438	6	67.9	1.24771	0.1668	0.133685
25	Yunnan	2011	0.198569	24.91	0.252007	77.6313	835	47.4941	0.300667	13.6826	0.100157	0.108886	4326.9	7.2291	420	0.0258462	8.37261	1.97811	2.61613	6.72743	0.2491	4.35157	6	24.8	0.928193	0.0309	0.0332905
25	Yunnan	2012	1.00288	84.43	0.251404	88.9778	835	50.5941	0.303754	14.635	0.106612	0.112566	4399.6	7.99087	570	0.0319641	8.38927	2.0783	2.68342	6.72743	0.8443	4.48864	6	28.5	0.974098	0.0354	0.0363413
25	Yunnan	2013	0.270504	137.9	0.242426	76.3346	835	51.877	0.306399	14.9137	0.115232	0.115134	4499.4	7.66627	859	0.0360661	8.4117	2.03683	2.70228	6.72743	1.379	4.33467	6	32.8	0.987574	0.0533	0.0539706
25	Yunnan	2014	0.346503	164.05	0.249746	98.5088	980.9	53.3714	0.315329	15.4277	0.121094	0.117869	4508.2	7.95063	1041	0.0431091	8.41365	2.07325	2.73616	6.88847	1.6405	4.59006	6	35.1	1.00691	0.0639	0.0634617
25	Yunnan	2015	0.188101	203.76	0.25778	86.3194	1106.6	52.1893	0.322687	15.7404	0.127268	0.120101	4487.3	8.1552	1670	0.0579885	8.40901	2.09866	2.75623	7.00905	2.0376	4.45783	6	37.4	0.981039	0.0853	0.0869486
25	Yunnan	2016	0.157807	217.34	0.266611	76.3346	1154.6	50.9848	0.347125	17.0816	0.140365	0.124952	4481.2	8.63466	2098	0.0712394	8.40765	2.15578	2.838	7.05151	2.1734	4.33467	6	39.9	0.975352	0.1105	0.113292
25	Yunnan	2017	0.130554	256.27	0.272637	75.8807	1178.7	51.1892	0.34155	17.6931	0.150704	0.126495	4169.2	8.49679	3086	0.0788171	8.33548	2.13969	2.87317	7.07217	2.5627	4.32942	6	42.3	0.963937	0.1207	0.125216
25	Yunnan	2018	0.11386	285.79	0.275451	60.9682	1117.3	54.3881	0.31545	17.3688	0.15229	0.0368607	4174.6	7.63337	3970	0.0915324	8.33677	2.03253	2.85468	7.01867	2.8579	4.11087	6	44.5	1.00522	0.1831	0.182148
25	Yunnan	2019	2.48748	303.46	0.277061	119.581	888.3	54.3012	0.294038	17.6021	0.173543	0.0377581	4165.8	6.83105	3501	0.109095	8.33466	1.92148	2.86802	6.78931	3.0346	4.78415	6	46.6	1.01891	0.2012	0.197465
25	Yunnan	2020	0.243412	318.48	0.282999	100.519	1001.1	49.02	0.281343	17.391	0.17739	0.0434926	4167.4	6.41601	3289	0.121147	8.33505	1.8588	2.85595	6.90885	3.1848	4.61016	6	48.5	0.94136	0.235	0.249639
25	Yunnan	2021	0.241242	333.9	0.280295	86.2547	958.3	54.1808	0.265445	16.625	0.246202	0.0401009	4191.4	5.82441	4608	0.130639	8.34079	1.76206	2.81091	6.86516	3.339	4.45783	6	67.8	1.01677	0.3514	0.345605
25	Yunnan	2022	0.17542	349.88	0.285432	73.2873	984.66	54.7018	0.257201	15.8472	0.232379	0.0401088	4211	5.74987	4596	0.139338	8.34545	1.74918	2.76299	6.8923	3.4988	4.29439	6	66.8	1.01104	0.348	0.3442
26	Shaanxi	2011	1.25279	40.96	0.303877	53.9659	829.49	65.445	0.495743	9.06769	0.314088	0.191342	3134.9	2.9658	713	0.0949462	8.05035	1.08715	2.20472	6.72081	0.4096	3.98898	7	38.3	1.27901	0.0834	0.0652065
26	Shaanxi	2012	1.63407	98.24	0.305338	53.2526	572.7	65.5019	0.565793	9.2199	0.336196	0.193946	3127.5	3.06727	712	0.113784	8.04799	1.12079	2.22136	6.35036	0.9824	3.97594	7	41.5	1.26112	0.0882	0.0699378
26	Shaanxi	2013	1.48493	148.37	0.294517	66.5658	618.1	66.0422	0.566245	9.5683	0.264722	0.213165	3105.1	3.04521	1149	0.129727	8.0408	1.11357	2.25846	6.42665	1.4837	4.19871	7	45	1.25724	0.1715	0.13641
26	Shaanxi	2014	1.49982	178.73	0.302548	41.6036	685.56	67.2632	0.540086	9.73198	0.255789	0.213979	3076.5	3.00321	1339	0.162223	8.03155	1.09968	2.27542	6.53024	1.7873	3.7281	7	46.4	1.26899	0.1822	0.143579
26	Shaanxi	2015	2.09725	216.12	0.305375	38.0375	598.06	66.8233	0.54137	10.0521	0.2573	0.215428	3073.5	3.05753	1687	0.158085	8.03057	1.11761	2.30779	6.39369	2.1612	3.63759	7	50	1.25612	0.2071	0.164872
26	Shaanxi	2016	1.71	229.37	0.300804	69.4186	566.38	66.7086	0.560189	10.5083	0.285275	0.223066	3068.7	3.17292	1609	0.17922	8.02901	1.15465	2.35216	6.33927	2.2937	4.23989	7	52.4	1.27615	0.2275	0.17827
26	Shaanxi	2017	1.39835	266.85	0.310809	67.279	760.5	68.0815	0.571249	10.8156	0.321981	0.229828	3019.4	3.27272	1619	0.182086	8.01281	1.18562	2.38099	6.63398	2.6685	4.20916	7	55.3	1.28203	0.2193	0.171056
26	Shaanxi	2018	1.75251	295.95	0.311657	78.9281	629.39	69.2891	0.56133	10.7912	0.326571	0.226351	3006	3.07993	2049	0.194188	8.00837	1.12491	2.37873	6.44475	2.9595	4.36818	7	58.2	1.28063	0.3142	0.245347
26	Shaanxi	2019	1.42008	322.89	0.311019	50.8752	700	69.1538	0.490114	10.8371	0.333535	0.227003	2998.9	2.95249	2192	0.217471	8.006	1.08265	2.38298	6.55108	3.2289	3.92986	7	61.3	1.29761	0.304	0.234277
26	Shaanxi	2020	1.55181	342.04	0.321283	47.547	649.4	69.1974	0.485267	10.7489	0.304653	0.224476	3001	2.87228	2319	0.23407	8.0067	1.05511	2.3748	6.47605	3.4204	3.86073	7	64.4	1.32884	0.4622	0.347823
26	Shaanxi	2021	1.87261	361.25	0.319099	65.6149	965.2	70.3765	0.479078	10.5731	0.368295	0.219368	3004.3	2.77922	3029	0.250621	8.0078	1.02217	2.35832	6.87233	3.6125	4.18358	7	67.5	1.3207	0.6804	0.515181
26	Shaanxi	2022	1.75524	380.76	0.27577	74.8866	633	47.1164	0.461042	10.9207	0.372489	0.217226	3017.5	2.61146	2799	0.266428	8.01218	0.95991	2.39066	6.45047	3.8076	4.31597	7	74.3	1.32957	0.621	0.467069
27	Gansu	2011	0.0389376	18.84	0.342265	70.3696	419.6	68.8774	0.213051	35.1639	0.110018	0.0722868	2833.7	16.7041	259	0.0314527	7.94934	2.81566	3.56002	6.0393	0.1884	4.25419	7	27.4	1.34609	0.0175	0.0130006
27	Gansu	2012	0.0458462	76.29	0.344122	69.2998	439.2	69.2634	0.224718	36.6784	0.116713	0.0807356	2839.4	17.9765	480	0.0452038	7.95135	2.88906	3.60219	6.08495	0.7629	4.23844	7	31	1.33354	0.0221	0.0165724
27	Gansu	2013	0.136882	128.39	0.339718	70.845	480.7	69.2012	0.227893	39.8929	0.121177	0.0827739	2858.7	18.7204	825	0.050662	7.95812	2.92961	3.6862	6.17524	1.2839	4.25986	7	34.7	1.31737	0.0317	0.0240631
27	Gansu	2014	0.129105	159.76	0.343517	55.5111	421.3	68.6746	0.232519	41.97	0.12212	0.0919595	2842.5	18.5348	903	0.0648455	7.95244	2.91965	3.73696	6.04335	1.5976	4.01638	7	36.8	1.29562	0.0311	0.024004
27	Gansu	2015	0.1546	199.78	0.346759	51.3873	368.2	68.6166	0.231528	43.4434	0.127775	0.100962	2849.6	18.6319	1373	0.0803902	7.95493	2.92488	3.77146	5.90863	1.9978	3.93964	7	38.8	1.28983	0.0388	0.0300814
27	Gansu	2016	0.168105	204.11	0.351411	80.5922	379.7	68.3055	0.249173	52.0356	0.144618	0.117892	2814	18.644	1637	0.0949509	7.94236	2.92552	3.95193	5.93938	2.0411	4.3895	7	42.4	1.3067	0.0523	0.0400245
27	Gansu	2017	0.186482	243.78	0.354856	72.1526	450.3	68.5165	0.225187	45.8923	0.148854	0.121269	2647.2	13.8593	1781	0.0954518	7.88126	2.62895	3.8263	6.10991	2.4378	4.27944	7	46.7	1.29022	0.0664	0.0514639
27	Gansu	2018	0.178644	266.82	0.354451	80.7111	514.9	70.2741	0.2204	42.7369	0.156561	0.10812	2645.3	11.3685	2930	0.112169	7.88054	2.43084	3.75506	6.24397	2.6682	4.39074	7	51	1.29884	0.0985	0.075837
27	Gansu	2019	0.204248	289.14	0.346819	68.8244	491.1	69.2108	0.211087	39.7361	0.161003	0.102046	2581.1	10.9354	2734	0.130147	7.85597	2.392	3.68226	6.19665	2.8914	4.2312	7	55.2	1.29868	0.0966	0.0743832
27	Gansu	2020	0.271356	305.5	0.340453	67.8734	506.5	67.686	0.204385	38.9023	0.167303	0.0918155	2638.3	10.2528	3064	0.139018	7.87789	2.32755	3.66105	6.22752	3.055	4.21804	7	59.3	1.29981	0.1384	0.106477
27	Gansu	2021	1.01568	322.17	0.334826	78.4526	428.9	66.5375	0.192726	42.7044	0.285175	0.0900473	2676.8	7.03044	3979	0.150171	7.89238	1.95025	3.7543	6.06122	3.2217	4.3631	7	63.4	1.24866	0.1899	0.152083
27	Gansu	2022	1.95419	339.77	0.332234	86.6545	360.8	46.6926	0.189813	43.8219	0.268101	0.0886285	2699.8	6.64714	1629	0.156444	7.90093	1.89419	3.78013	5.88832	3.3977	4.46245	7	64.7	1.24547	0.1673	0.134327
28	Qinghai	2011	0.241791	18.33	0.466012	62.1677	324.5	44.5845	0.150995	9.87011	0.0743108	0.113201	279.4	3.65163	39	0.0471867	5.63265	1.29517	2.28951	5.78229	0.1833	4.13035	7	36.9	0.87133	0.0018	0.00206581
28	Qinghai	2012	1.03265	61.47	0.454106	66.8927	328.3	44.3758	0.167809	9.61599	0.0804764	0.115482	280.2	3.24792	52	0.0555153	5.6355	1.17802	2.26343	5.79393	0.6147	4.2032	7	41.9	0.854375	0.0033	0.00386247
28	Qinghai	2013	0.300721	118.01	0.33629	85.2578	332.1	45.2917	0.176322	11.6449	0.0809644	0.116949	280	3.59842	78	0.0509186	5.63479	1.28049	2.45487	5.80544	1.1801	4.44618	7	47.8	0.86221	0.0043	0.00498719
28	Qinghai	2014	0.286503	145.93	0.329583	60.1173	336	44.0349	0.175908	12.725	0.0895792	0.119198	280.1	3.43146	79	0.0600679	5.63515	1.23299	2.54357	5.81711	1.4593	4.09601	7	50	0.830765	0.0031	0.0037315
28	Qinghai	2015	0.172119	195.15	0.352782	51.5588	339.8	45.4161	0.181411	13.211	0.105838	0.116404	277.1	3.58166	157	0.0822826	5.62438	1.27583	2.58105	5.82836	1.9515	3.94352	7	54.5	0.853718	0.0105	0.0122991
28	Qinghai	2016	0.0843677	200.38	0.362797	88.378	304.7	45.9032	0.157074	14.244	0.106509	0.114757	281.1	3.40685	199	0.116516	5.63871	1.22579	2.65634	5.71933	2.0038	4.48187	7	54.5	0.878139	0.0121	0.0137791
28	Qinghai	2017	0.146321	240.2	0.372062	67.3385	338.9	44.5976	0.156132	15.1554	0.115613	0.115253	282.6	3.42157	171	0.101193	5.64403	1.2301	2.71835	5.82571	2.402	4.20916	7	55.6	0.839813	0.0141	0.0167895
28	Qinghai	2018	0.15026	263.12	0.3841	90.7851	403.9	41.6919	0.149291	13.5588	0.117531	0.114839	281.3	3.22986	342	0.116178	5.63942	1.17244	2.60704	6.00117	2.6312	4.50866	7	56.5	0.770569	0.0231	0.0299778
28	Qinghai	2019	0.222859	282.65	0.385392	67.1602	374	39.8922	0.111834	14.056	0.128997	0.119241	280.2	2.52936	384	0.127669	5.6355	0.927966	2.64305	5.92426	2.8265	4.20767	7	57.4	0.748541	0.0296	0.0395436
28	Qinghai	2020	0.383774	298.23	0.383693	69.1215	367.1	37.1919	0.0953798	12.9121	0.131257	0.113756	290	2.15786	633	0.132907	5.66988	0.769116	2.55817	5.90563	2.9823	4.23555	7	58.2	0.714217	0.0403	0.0564254
28	Qinghai	2021	0.307185	313.88	0.375407	74.6488	356.2	38.7357	0.0837472	12.2607	0.247988	0.118171	302.4	1.83079	701	0.154189	5.71175	0.604749	2.5064	5.87549	3.1388	4.31214	7	65.4	0.726922	0.0549	0.0755239
28	Qinghai	2022	0.247487	330.35	0.37871	84.4554	341.1	38.2979	0.0801774	11.9413	0.249062	0.110884	303.5	1.7059	580	0.165499	5.71538	0.534094	2.48	5.83218	3.3035	4.43622	7	70.1	0.777895	0.05	0.064276
29	Ningxia	2011	0.219528	31.31	0.39609	76.0752	284	61.6388	0.303396	12.0942	0.0952872	0.165027	852.4	2.14218	89	0.0527173	6.74806	0.761823	2.49273	5.64897	0.3131	4.33205	7	32.8	1.20463	0.0055	0.00456573
29	Ningxia	2012	0.300802	87.13	0.417651	71.796	339	60.754	0.317757	12.3121	0.102723	0.178053	828.3	2.17531	91	0.0616322	6.71938	0.777173	2.51058	5.826	0.8713	4.27388	7	40.3	1.16971	0.0052	0.00444556
29	Ningxia	2013	0.347468	136.74	0.434634	78.4526	319	60.5906	0.31976	13.1472	0.109433	0.174745	801.6	2.13489	133	0.067559	6.68661	0.758417	2.57621	5.76519	1.3674	4.3631	7	43.7	1.15345	0.0101	0.00875632
29	Ningxia	2014	0.310594	165.26	0.442783	54.6791	364	59.2106	0.31655	12.1938	0.108203	0.177147	771.3	2.07469	153	0.0823198	6.64808	0.729811	2.50093	5.89715	1.6526	4.00186	7	45.1	1.11707	0.0132	0.0118166
29	Ningxia	2015	0.0367533	214.7	0.447295	56.1055	288	61.9329	0.317017	12.3688	0.109046	0.17555	770.4	2.05599	239	0.0927478	6.64691	0.720756	2.51518	5.66296	2.147	4.02714	7	49.3	1.1642	0.0179	0.0153754
29	Ningxia	2016	0.108697	212.36	0.460428	75.1242	301	60.3925	0.363961	13.5295	0.126564	0.201108	778.3	2.32392	337	0.112726	6.65711	0.843255	2.60487	5.70711	2.1236	4.31882	7	50.7	1.15532	0.0259	0.022418
29	Ningxia	2017	0.0760424	255.59	0.45156	77.9771	331.6	59.7116	0.360233	13.321	0.129172	0.194243	722.5	2.20731	470	0.137969	6.58272	0.791775	2.58934	5.80393	2.5559	4.35671	7	52.3	1.12442	0.0324	0.0288148
29	Ningxia	2018	0.374649	272.92	0.449479	79.4035	389.2	59.8555	0.329469	12.8587	0.129229	0.18633	735.7	1.97493	725	0.156524	6.60082	0.680531	2.55402	5.96409	2.7292	4.3745	7	53.7	1.10628	0.0512	0.0462814
29	Ningxia	2019	0.111651	292.31	0.466877	64.6639	345.7	56.5581	0.333391	13.5299	0.139809	0.18647	677.4	1.90807	759	0.167777	6.51826	0.64609	2.6049	5.84557	2.9231	4.16976	7	55	1.06126	0.0544	0.0512597
29	Ningxia	2020	0.186801	310.02	0.470547	69.4186	309.7	56.5961	0.324136	13.9567	0.143502	0.182252	679.2	1.85147	1049	0.178289	6.52092	0.615982	2.63596	5.7356	3.1002	4.23989	7	56.2	1.08685	0.0676	0.0621983
29	Ningxia	2021	0.28943	328.23	0.469853	93.1922	274	54.3162	0.318565	15.2717	0.345523	0.174335	689.3	1.87431	1367	0.200379	6.53568	0.62824	2.726	5.61313	3.2823	4.53475	7	57.4	1.01931	0.1247	0.122338
29	Ningxia	2022	0.0741267	347.39	0.47129	85.1091	254	56.0976	0.310214	17.6545	0.27995	0.174023	692.3	1.68138	1435	0.214767	6.54002	0.519614	2.87099	5.53733	3.4739	4.44393	7	71.5	0.995478	0.1175	0.118034
30	Xinjiang	2011	1.03829	20.34	0.867981	64.0828	167.1	72.1052	0.368576	36.7166	0.143774	0.135648	2047.5	3.87278	401	0.0291645	7.62437	1.35397	3.60323	5.11859	0.2034	4.16044	7	40.4	1.40918	0.0166	0.0117799
30	Xinjiang	2012	1.56485	82.45	0.862139	57.0035	158.1	71.8742	0.376081	36.6432	0.147954	0.140713	2131.2	3.86424	532	0.0411259	7.66444	1.35177	3.60123	5.06323	0.8245	4.04305	7	43.6	1.38381	0.0166	0.0119959
30	Xinjiang	2013	1.70018	143.4	1.00536	44.3772	176.8	69.057	0.389885	39.6497	0.161004	0.148495	2234.8	4.08649	750	0.0220359	7.71191	1.40769	3.68008	5.17502	1.434	3.79324	7	49	1.31463	0.0292	0.0222116
30	Xinjiang	2014	1.60122	163.67	0.952241	49.2904	146.4	68.8185	0.429498	47.6514	0.174931	0.145172	2255.9	4.85718	784	0.0494471	7.7213	1.58046	3.86391	4.98634	1.6367	3.89792	7	50.3	1.29833	0.0304	0.0234147
30	Xinjiang	2015	1.76012	205.49	0.955453	60.4375	195.3	68.6429	0.430914	46.7061	0.180762	0.149897	2395	4.48127	1223	0.0681712	7.78114	1.49991	3.84388	5.27454	2.0549	4.10099	7	54.9	1.29033	0.0471	0.0365023
30	Xinjiang	2016	1.76772	208.72	0.841379	63.7659	219.6	69.545	0.422525	44.9559	0.182663	0.148278	2401.1	4.66114	1256	0.0815844	7.78368	1.53926	3.80568	5.39181	2.0872	4.15575	7	54.9	1.33041	0.0544	0.0408896
30	Xinjiang	2017	1.86688	248.69	0.84123	63.2375	163.3	69.5379	0.425922	42.9159	0.188772	0.149992	2295.9	4.70528	1427	0.0838017	7.73888	1.54869	3.75924	5.09559	2.4869	4.1463	7	57.5	1.30946	0.0667	0.0509371
30	Xinjiang	2018	1.69726	271.84	0.804671	60.0148	168.5	69.8545	0.420159	44.4626	0.196971	0.15736	2219.6	3.90516	1428	0.0948288	7.70508	1.3623	3.79465	5.12694	2.7184	4.09434	7	60.1	1.29108	0.0827	0.0640548
30	Xinjiang	2019	1.9005	294.34	0.803873	57.2149	145.7	67.9444	0.417763	42.5733	0.202318	0.152674	2203.6	3.71151	1188	0.103744	7.69785	1.31144	3.75123	4.98155	2.9434	4.04655	7	62.7	1.27492	0.0773	0.0606315
30	Xinjiang	2020	1.89084	308.35	0.779195	52.83	199.6	68.0397	0.395271	41.3494	0.203025	0.135669	2230.2	3.475	1454	0.111329	7.70985	1.2456	3.72206	5.29631	3.0835	3.96651	7	65.5	1.30661	0.1131	0.0865601
30	Xinjiang	2021	1.94935	323.18	0.766102	64.1885	143.7	67.838	0.37682	40.9367	0.422582	0.134327	2371.7	3.19191	2372	0.130265	7.77136	1.16062	3.71203	4.96773	3.2318	4.162	7	68.3	1.27306	0.1771	0.139114
30	Xinjiang	2022	2.07725	338.32	1.00641	76.7091	141.3	35.7817	0.375321	42.9687	0.336819	0.134296	2433.9	3.08019	2355	0.14223	7.79725	1.12499	3.76047	4.95089	3.3832	4.34002	7	77.9	1.26868	0.1775	0.139909
